# Supplementary material for: Robustness of radiomic features in magnetic resonance imaging for patients with glioblastoma: Multi-center study
Source: PubMed Central journal article supplement — Phys Imaging Radiat Oncol. 2022 May 14;22:131–6. doi: 10.1016/j.phro.2022.05.006 (PMC9130546; doi:10.1016/j.phro.2022.05.006), 2022-05-14
Supplement: mmc1.pdf [file mmc1.pdf]

## Supplement materials

### Robustness of radiomic features in magnetic resonance imaging for patients with glioblastoma: multi-center study

Natalia Saltybaeva<sup>1</sup>, Marta Bogowicz<sup>1</sup>, Diem Vuong<sup>1</sup>, Simon Burgermeister<sup>1</sup>, Michael Mayinger<sup>1</sup>, Matthias Guckenberger<sup>1</sup>, Stephanie Tanadini-Lang<sup>1</sup>

1. Department of Radiation Oncology, University Hospital Zurich, Zurich, Switzerland

**Table S1:** Intraclass correlation coefficient for shape features and different normalizations. FBN - fixed bin number, FBS1 - fixed bin size linear interpolation with using eye and brain, FBS2 - fixed bin size linear interpolation with using eye and contrast-enhanced region, HM brain - histogram matching based on brain mask, HM VOI - histogram matching based on tumor mask, ZS brain - z-score based on brain mask, ZS VOI - z-score based on tumor mask.

| Shape features               | FBN   | FBS1  | FBS2  | HM_brain | HM_VOI | ZS_brain | ZS_VOI |
|------------------------------|-------|-------|-------|----------|--------|----------|--------|
| volume                       | 0.954 | 0.954 | 0.954 | 0.954    | 0.954  | 0.954    | 0.954  |
| surface                      | 0.979 | 0.979 | 0.979 | 0.979    | 0.979  | 0.979    | 0.979  |
| compactness_1                | 0.916 | 0.916 | 0.916 | 0.916    | 0.916  | 0.916    | 0.916  |
| compactness_2                | 0.901 | 0.901 | 0.901 | 0.901    | 0.901  | 0.901    | 0.901  |
| spherical disproportion      | 0.933 | 0.933 | 0.933 | 0.933    | 0.933  | 0.933    | 0.933  |
| sphericity                   | 0.920 | 0.920 | 0.920 | 0.920    | 0.920  | 0.920    | 0.920  |
| asphericity                  | 0.933 | 0.933 | 0.933 | 0.933    | 0.933  | 0.933    | 0.933  |
| surface to volume ratio      | 0.913 | 0.913 | 0.913 | 0.913    | 0.913  | 0.913    | 0.913  |
| median thickness             | 0.912 | 0.912 | 0.912 | 0.912    | 0.912  | 0.912    | 0.912  |
| standard deviation thickness | 0.905 | 0.905 | 0.905 | 0.905    | 0.905  | 0.905    | 0.905  |
| euclidian distance           | 0.981 | 0.981 | 0.981 | 0.981    | 0.981  | 0.981    | 0.981  |
| major axis length            | 0.991 | 0.991 | 0.991 | 0.991    | 0.991  | 0.991    | 0.991  |
| minor axis length            | 0.984 | 0.984 | 0.984 | 0.984    | 0.984  | 0.984    | 0.984  |
| least axis length            | 0.961 | 0.961 | 0.961 | 0.961    | 0.961  | 0.961    | 0.961  |
| elongation                   | 0.922 | 0.922 | 0.922 | 0.922    | 0.922  | 0.922    | 0.922  |
| flatness                     | 0.960 | 0.960 | 0.960 | 0.960    | 0.960  | 0.960    | 0.960  |
| fractal dimension            | 0.552 | 0.552 | 0.552 | 0.529    | 0.552  | 0.552    | 0.552  |
| center of mass shift         | 0.660 | 0.047 | 0.068 | 0.602    | 0.857  | 0.217    | 0.143  |

**Table S2:** Intraclass correlation coefficient for intensity features and different normalizations. FBN - fixed bin number, FBS1 - fixed bin size linear interpolation with using eye and brain, FBS2 - fixed bin size linear interpolation with using eye and contrast-enhanced region, HM brain - histogram matching based on brain mask, HM VOI - histogram matching based on tumor mask, ZS brain - z-score based on brain mask, ZS VOI - z-score based on tumor mask.

| Intensity features            | FBN   | FBS1  | FBS2  | HM_brain | HM_VOI | ZS_brain | ZS_VOI |
|-------------------------------|-------|-------|-------|----------|--------|----------|--------|
| mean                          | 0.248 | 0.760 | 0.609 | 0.685    | 0.592  | 0.665    | 0.000  |
| standard deviation            | 0.000 | 0.422 | 0.553 | 0.849    | 0.163  | 0.690    | 0.000  |
| coefficient of variation      | 0.304 | 0.081 | 0.133 | 0.703    | 0.100  | 0.651    | 0.000  |
| skewness                      | 0.494 | 0.494 | 0.494 | 0.821    | 0.933  | 0.494    | 0.494  |
| kurtosis                      | 0.539 | 0.539 | 0.539 | 0.652    | 0.036  | 0.539    | 0.539  |
| variance                      | 0.000 | 0.378 | 0.520 | 0.895    | 0.163  | 0.670    | 0.000  |
| median                        | 0.287 | 0.658 | 0.584 | 0.530    | 0.000  | 0.557    | 0.466  |
| percentile 10th               | 0.438 | 0.773 | 0.683 | 0.352    | 0.098  | 0.477    | 0.501  |
| percentile 90th               | 0.110 | 0.197 | 0.149 | 0.819    | 0.000  | 0.769    | 0.650  |
| interquartile range           | 0.000 | 0.450 | 0.638 | 0.916    | 0.173  | 0.648    | 0.726  |
| range                         | 0.208 | 0.095 | 0.060 | 0.594    | 0.980  | 0.451    | 0.557  |
| mean absolut deviation        | 0.000 | 0.442 | 0.594 | 0.894    | 0.023  | 0.681    | 0.746  |
| robust mean absolut deviation | 0.000 | 0.445 | 0.618 | 0.907    | 0.719  | 0.654    | 0.708  |
| energy                        | 0.039 | 0.826 | 0.767 | 0.746    | 0.956  | 0.650    | 0.956  |
| entropy                       | 0.502 | 0.472 | 0.645 | 0.715    | 0.506  | 0.660    | 0.486  |
| root mean square              | 0.214 | 0.465 | 0.268 | 0.747    | 0.622  | 0.612    | 0.000  |
| uniformity                    | 0.477 | 0.534 | 0.649 | 0.788    | 0.000  | 0.678    | 0.481  |

**Table S3:** Intraclass correlation coefficient for texture features and different normalizations. FBN - fixed bin number, FBS1 - fixed bin size linear interpolation with using eye and brain, FBS2 - fixed bin size linear interpolation with using eye and contrast-enhanced region, HM brain - histogram matching based on brain mask, HM VOI - histogram matching based on tumor mask, ZS brain - z-score based on brain mask, ZS VOI - z-score based on tumor mask

| Texture features                      | FBN   | FBS1  | FBS2  | HM_brain | HM_VOI | ZS_brain | ZS_VOI |
|---------------------------------------|-------|-------|-------|----------|--------|----------|--------|
| uniformity                            | 0.477 | 0.534 | 0.649 | 0.788    | 0.000  | 0.678    | 0.481  |
| energy                                | 0.421 | 0.514 | 0.535 | 0.827    | 0.786  | 0.585    | 0.582  |
| entropy                               | 0.422 | 0.509 | 0.620 | 0.713    | 0.902  | 0.700    | 0.644  |
| contrast                              | 0.671 | 0.428 | 0.558 | 0.928    | 0.739  | 0.643    | 0.754  |
| correlation                           | 0.739 | 0.748 | 0.747 | 0.712    | 0.725  | 0.740    | 0.747  |
| homogeneity                           | 0.737 | 0.679 | 0.788 | 0.848    | 0.598  | 0.801    | 0.766  |
| homogeneity normalized                | 0.665 | 0.673 | 0.676 | 0.829    | 0.753  | 0.684    | 0.659  |
| inverse difference                    | 0.738 | 0.666 | 0.792 | 0.850    | 0.622  | 0.782    | 0.786  |
| inverse difference normalized         | 0.713 | 0.712 | 0.717 | 0.841    | 0.693  | 0.727    | 0.706  |
| variance                              | 0.665 | 0.416 | 0.526 | 0.893    | 0.641  | 0.724    | 0.791  |
| sum of average                        | 0.489 | 0.017 | 0.010 | 0.652    | 0.641  | 0.637    | 0.616  |
| sum of entropy                        | 0.486 | 0.458 | 0.603 | 0.786    | 0.901  | 0.672    | 0.434  |
| sum of variance                       | 0.643 | 0.420 | 0.520 | 0.841    | 0.682  | 0.771    | 0.760  |
| difference entropy                    | 0.715 | 0.541 | 0.635 | 0.870    | 0.576  | 0.698    | 0.803  |
| difference variance                   | 0.635 | 0.394 | 0.406 | 0.904    | 0.746  | 0.640    | 0.313  |
| information measures of correlation 1 | 0.925 | 0.853 | 0.899 | 0.941    | 0.849  | 0.943    | 0.700  |

|                                       |       |       |       |       |       |       |       |
|---------------------------------------|-------|-------|-------|-------|-------|-------|-------|
| information measures of correlation 2 | 0.750 | 0.523 | 0.555 | 0.675 | 0.849 | 0.703 | 0.632 |
| maximal correlation coefficient       | 0.692 | 0.813 | 0.769 | 0.847 | 0.719 | 0.885 | 0.647 |
| joint maximum                         | 0.274 | 0.575 | 0.604 | 0.750 | 0.574 | 0.503 | 0.592 |
| joint average                         | 0.489 | 0.017 | 0.010 | 0.652 | 0.641 | 0.637 | 0.616 |
| difference average                    | 0.702 | 0.514 | 0.672 | 0.887 | 0.703 | 0.693 | 0.844 |
| dissimilarity                         | 0.702 | 0.514 | 0.672 | 0.887 | 0.703 | 0.693 | 0.844 |
| inverse variance                      | 0.787 | 0.636 | 0.759 | 0.857 | 0.522 | 0.789 | 0.759 |
| autocorrelation                       | 0.408 | 0.007 | 0.002 | 0.563 | 0.627 | 0.508 | 0.561 |
| cluster tendency                      | 0.643 | 0.420 | 0.520 | 0.841 | 0.682 | 0.771 | 0.760 |
| cluster shade                         | 0.690 | 0.635 | 0.798 | 0.798 | 0.399 | 0.791 | 0.709 |
| cluster prominence                    | 0.642 | 0.457 | 0.534 | 0.891 | 0.528 | 0.876 | 0.775 |
| energy                                | 0.502 | 0.532 | 0.560 | 0.836 | 0.630 | 0.637 | 0.615 |
| entropy                               | 0.586 | 0.514 | 0.692 | 0.749 | 0.621 | 0.690 | 0.619 |
| contrast                              | 0.663 | 0.423 | 0.554 | 0.925 | 0.732 | 0.636 | 0.746 |
| correlation                           | 0.727 | 0.735 | 0.734 | 0.695 | 0.713 | 0.727 | 0.733 |
| homogeneity                           | 0.736 | 0.674 | 0.782 | 0.847 | 0.584 | 0.798 | 0.759 |
| homogeneity normalized                | 0.666 | 0.665 | 0.670 | 0.826 | 0.733 | 0.678 | 0.650 |
| inverse difference                    | 0.735 | 0.662 | 0.788 | 0.847 | 0.612 | 0.780 | 0.779 |
| inverse difference normalized         | 0.711 | 0.709 | 0.714 | 0.839 | 0.684 | 0.721 | 0.700 |
| variance                              | 0.664 | 0.416 | 0.525 | 0.893 | 0.638 | 0.724 | 0.789 |
| sum of average                        | 0.490 | 0.017 | 0.012 | 0.651 | 0.641 | 0.637 | 0.616 |
| sum of entropy                        | 0.582 | 0.519 | 0.662 | 0.817 | 0.703 | 0.730 | 0.314 |
| sum of variance                       | 0.644 | 0.422 | 0.519 | 0.841 | 0.674 | 0.772 | 0.750 |
| difference entropy                    | 0.753 | 0.574 | 0.672 | 0.887 | 0.655 | 0.741 | 0.856 |
| difference variance                   | 0.659 | 0.406 | 0.418 | 0.898 | 0.758 | 0.663 | 0.306 |
| information measures of correlation 1 | 0.632 | 0.550 | 0.582 | 0.665 | 0.510 | 0.675 | 0.599 |
| information measures of correlation 2 | 0.701 | 0.676 | 0.727 | 0.788 | 0.665 | 0.780 | 0.617 |
| maximal correlation coefficient       | 0.739 | 0.766 | 0.769 | 0.791 | 0.773 | 0.779 | 0.744 |
| joint maximum                         | 0.370 | 0.591 | 0.621 | 0.757 | 0.482 | 0.532 | 0.608 |
| joint average                         | 0.490 | 0.017 | 0.012 | 0.651 | 0.641 | 0.637 | 0.616 |
| difference average                    | 0.697 | 0.513 | 0.668 | 0.936 | 0.694 | 0.688 | 0.836 |
| dissimilarity                         | 0.697 | 0.513 | 0.668 | 0.936 | 0.694 | 0.688 | 0.836 |
| inverse variance                      | 0.786 | 0.636 | 0.757 | 0.856 | 0.509 | 0.786 | 0.759 |
| autocorrelation                       | 0.408 | 0.006 | 0.002 | 0.563 | 0.627 | 0.509 | 0.561 |
| cluster tendency                      | 0.644 | 0.422 | 0.519 | 0.841 | 0.674 | 0.772 | 0.750 |
| cluster shade                         | 0.700 | 0.629 | 0.793 | 0.799 | 0.388 | 0.788 | 0.709 |
| cluster prominence                    | 0.645 | 0.463 | 0.534 | 0.891 | 0.516 | 0.878 | 0.774 |
| coarseness                            | 0.913 | 0.928 | 0.931 | 0.892 | 0.852 | 0.910 | 0.927 |
| contrast                              | 0.727 | 0.513 | 0.663 | 0.882 | 0.779 | 0.657 | 0.669 |
| busyness                              | 0.846 | 0.347 | 0.057 | 0.511 | 0.947 | 0.840 | 0.750 |
| complexity                            | 0.509 | 0.409 | 0.538 | 0.837 | 0.800 | 0.680 | 0.445 |
| strength                              | 0.838 | 0.692 | 0.707 | 0.835 | 0.847 | 0.878 | 0.721 |
| grey level non-uniformity             | 0.818 | 0.949 | 0.958 | 0.951 | 0.958 | 0.960 | 0.978 |
| grey level non-uniformity normalized  | 0.499 | 0.518 | 0.637 | 0.776 | 0.487 | 0.681 | 0.429 |
| zone size non-uniformity              | 0.944 | 0.955 | 0.960 | 0.962 | 0.972 | 0.959 | 0.964 |
| zone size non-uniformity normalized   | 0.739 | 0.719 | 0.812 | 0.836 | 0.719 | 0.811 | 0.791 |
| short runs emphasis                   | 0.732 | 0.717 | 0.793 | 0.862 | 0.709 | 0.825 | 0.797 |
| long runs emphasis                    | 0.683 | 0.758 | 0.810 | 0.893 | 0.679 | 0.864 | 0.809 |
| low grey level run emphasis           | 0.492 | 0.537 | 0.389 | 0.536 | 0.894 | 0.614 | 0.610 |
| high grey level run emphasis          | 0.362 | 0.000 | 0.000 | 0.642 | 0.972 | 0.568 | 0.559 |
| short run low grey level emphasis     | 0.493 | 0.563 | 0.427 | 0.438 | 0.880 | 0.598 | 0.667 |
| short run high grey level emphasis    | 0.382 | 0.000 | 0.000 | 0.645 | 0.928 | 0.580 | 0.552 |
| long run low grey level emphasis      | 0.610 | 0.474 | 0.304 | 0.817 | 0.798 | 0.646 | 0.435 |

|                                         |       |       |       |       |       |       |       |
|-----------------------------------------|-------|-------|-------|-------|-------|-------|-------|
| long run high grey level emphasis       | 0.293 | 0.000 | 0.007 | 0.618 | 0.846 | 0.519 | 0.585 |
| run percentage                          | 0.712 | 0.737 | 0.815 | 0.853 | 0.701 | 0.835 | 0.784 |
| grey level variance                     | 0.667 | 0.381 | 0.521 | 0.883 | 0.465 | 0.673 | 0.713 |
| run length variance                     | 0.655 | 0.790 | 0.834 | 0.882 | 0.675 | 0.880 | 0.812 |
| run entropy                             | 0.409 | 0.372 | 0.525 | 0.602 | 0.845 | 0.608 | 0.695 |
| grey level non-uniformity               | 0.818 | 0.949 | 0.958 | 0.951 | 0.958 | 0.961 | 0.978 |
| grey level non-uniformity normalized    | 0.497 | 0.530 | 0.648 | 0.776 | 0.580 | 0.686 | 0.421 |
| zone size non-uniformity                | 0.944 | 0.954 | 0.960 | 0.962 | 0.972 | 0.959 | 0.964 |
| zone size non-uniformity normalized     | 0.741 | 0.719 | 0.812 | 0.836 | 0.718 | 0.812 | 0.793 |
| short runs emphasis                     | 0.736 | 0.722 | 0.800 | 0.862 | 0.708 | 0.825 | 0.801 |
| long runs emphasis                      | 0.685 | 0.762 | 0.815 | 0.892 | 0.685 | 0.865 | 0.812 |
| low grey level run emphasis             | 0.500 | 0.543 | 0.400 | 0.543 | 0.902 | 0.615 | 0.604 |
| high grey level run emphasis            | 0.362 | 0.000 | 0.000 | 0.642 | 0.972 | 0.568 | 0.559 |
| short run low grey level emphasis       | 0.498 | 0.563 | 0.423 | 0.442 | 0.906 | 0.616 | 0.673 |
| short run high grey level emphasis      | 0.382 | 0.000 | 0.000 | 0.645 | 0.930 | 0.580 | 0.552 |
| long run low grey level emphasis        | 0.605 | 0.457 | 0.309 | 0.815 | 0.797 | 0.640 | 0.437 |
| long run high grey level emphasis       | 0.294 | 0.000 | 0.007 | 0.619 | 0.850 | 0.519 | 0.585 |
| run percentage                          | 0.715 | 0.738 | 0.815 | 0.852 | 0.704 | 0.835 | 0.784 |
| grey level variance                     | 0.667 | 0.381 | 0.521 | 0.883 | 0.465 | 0.673 | 0.710 |
| run length variance                     | 0.657 | 0.789 | 0.834 | 0.882 | 0.671 | 0.881 | 0.812 |
| run entropy                             | 0.433 | 0.386 | 0.541 | 0.620 | 0.765 | 0.618 | 0.625 |
| grey level non-uniformity               | 0.896 | 0.944 | 0.894 | 0.896 | 0.936 | 0.950 | 0.954 |
| grey level non-uniformity normalized    | 0.453 | 0.357 | 0.421 | 0.452 | 0.459 | 0.579 | 0.668 |
| zone size non-uniformity                | 0.738 | 0.564 | 0.701 | 0.762 | 0.761 | 0.773 | 0.942 |
| zone size non-uniformity normalized     | 0.285 | 0.332 | 0.399 | 0.022 | 0.632 | 0.501 | 0.083 |
| small zone emphasis                     | 0.293 | 0.361 | 0.412 | 0.005 | 0.625 | 0.491 | 0.064 |
| large zone emphasis                     | 0.278 | 0.737 | 0.743 | 0.924 | 0.663 | 0.813 | 0.919 |
| low grey level zone emphasis            | 0.266 | 0.521 | 0.493 | 0.468 | 0.789 | 0.531 | 0.682 |
| high grey level zone emphasis           | 0.286 | 0.000 | 0.000 | 0.572 | 0.669 | 0.701 | 0.523 |
| small zone low grey level emphasis      | 0.000 | 0.555 | 0.602 | 0.476 | 0.873 | 0.327 | 0.485 |
| small zone high grey level emphasis     | 0.416 | 0.000 | 0.020 | 0.478 | 0.525 | 0.705 | 0.582 |
| large zone low grey level emphasis      | 0.600 | 0.000 | 0.000 | 0.753 | 0.407 | 0.510 | 0.710 |
| large zone high grey level emphasis     | 0.828 | 0.776 | 0.776 | 0.613 | 0.734 | 0.813 | 0.829 |
| zone percentage                         | 0.784 | 0.666 | 0.829 | 0.656 | 0.784 | 0.753 | 0.790 |
| grey level variance                     | 0.646 | 0.334 | 0.484 | 0.706 | 0.333 | 0.650 | 0.754 |
| zone size variance                      | 0.257 | 0.747 | 0.752 | 0.927 | 0.677 | 0.804 | 0.915 |
| zone size entropy                       | 0.356 | 0.587 | 0.625 | 0.708 | 0.894 | 0.685 | 0.663 |
| grey level non-uniformity               | 0.896 | 0.944 | 0.894 | 0.896 | 0.936 | 0.950 | 0.954 |
| grey level non-uniformity normalized    | 0.459 | 0.350 | 0.419 | 0.464 | 0.474 | 0.552 | 0.672 |
| zone size non-uniformity                | 0.834 | 0.919 | 0.926 | 0.817 | 0.908 | 0.959 | 0.969 |
| zone size non-uniformity normalized     | 0.710 | 0.689 | 0.794 | 0.623 | 0.801 | 0.767 | 0.743 |
| small distance emphasis                 | 0.637 | 0.592 | 0.735 | 0.417 | 0.814 | 0.694 | 0.748 |
| large distance emphasis                 | 0.559 | 0.472 | 0.693 | 0.378 | 0.908 | 0.536 | 0.686 |
| low grey level zone emphasis            | 0.264 | 0.488 | 0.480 | 0.460 | 0.800 | 0.534 | 0.683 |
| high grey level zone emphasis           | 0.286 | 0.000 | 0.000 | 0.572 | 0.669 | 0.701 | 0.523 |
| small distance low grey level emphasis  | 0.466 | 0.413 | 0.447 | 0.642 | 0.889 | 0.669 | 0.771 |
| small distance high grey level emphasis | 0.125 | 0.000 | 0.000 | 0.546 | 0.648 | 0.626 | 0.580 |
| large distance low grey level emphasis  | 0.685 | 0.412 | 0.388 | 0.365 | 0.803 | 0.339 | 0.560 |
| large distance high grey level emphasis | 0.377 | 0.080 | 0.109 | 0.196 | 0.865 | 0.552 | 0.680 |
| zone percentage                         | 0.784 | 0.666 | 0.829 | 0.656 | 0.784 | 0.753 | 0.791 |
| grey level variance                     | 0.646 | 0.334 | 0.484 | 0.706 | 0.333 | 0.650 | 0.754 |
| zone distance variance                  | 0.612 | 0.551 | 0.690 | 0.593 | 0.818 | 0.594 | 0.644 |

|                                            |       |       |       |       |       |       |       |
|--------------------------------------------|-------|-------|-------|-------|-------|-------|-------|
| zone distance entropy                      | 0.413 | 0.421 | 0.530 | 0.527 | 0.824 | 0.657 | 0.765 |
| grey level non-uniformity                  | 0.788 | 0.946 | 0.959 | 0.952 | 0.955 | 0.961 | 0.982 |
| grey level non-uniformity normalized       | 0.475 | 0.531 | 0.647 | 0.786 | 0.451 | 0.668 | 0.485 |
| dependence count non-uniformity            | 0.704 | 0.685 | 0.893 | 0.795 | 0.977 | 0.827 | 0.928 |
| dependence count non-uniformity normalized | 0.741 | 0.573 | 0.838 | 0.582 | 0.725 | 0.685 | 0.752 |
| low dependence emphasis                    | 0.747 | 0.595 | 0.780 | 0.588 | 0.768 | 0.691 | 0.713 |
| high dependence emphasis                   | 0.634 | 0.794 | 0.827 | 0.881 | 0.719 | 0.900 | 0.800 |
| low grey level count emphasis              | 0.499 | 0.549 | 0.396 | 0.610 | 0.906 | 0.611 | 0.490 |
| high grey level count emphasis             | 0.372 | 0.000 | 0.000 | 0.631 | 0.980 | 0.562 | 0.569 |
| low dependence low grey level emphasis     | 0.419 | 0.761 | 0.694 | 0.425 | 0.919 | 0.591 | 0.538 |
| low dependence high grey level emphasis    | 0.608 | 0.174 | 0.189 | 0.519 | 0.573 | 0.684 | 0.542 |
| high dependence low grey level emphasis    | 0.696 | 0.000 | 0.000 | 0.835 | 0.507 | 0.787 | 0.258 |
| high dependence high grey level emphasis   | 0.574 | 0.529 | 0.522 | 0.578 | 0.814 | 0.582 | 0.713 |
| grey level variance                        | 0.662 | 0.381 | 0.521 | 0.895 | 0.000 | 0.671 | 0.215 |
| dependence count variance                  | 0.567 | 0.841 | 0.863 | 0.809 | 0.790 | 0.916 | 0.756 |
| dependence count entropy                   | 0.769 | 0.692 | 0.714 | 0.749 | 0.860 | 0.751 | 0.812 |
| dependence count energy                    | 0.776 | 0.652 | 0.700 | 0.706 | 0.880 | 0.731 | 0.829 |

**Table S4:** Intraclass correlation coefficient for wavelet features and different normalizations. FBN - fixed bin number, FBS1 - fixed bin size linear interpolation with using eye and brain, FBS2 - fixed bin size linear interpolation with using eye and contrast-enhanced region, HM brain - histogram matching based on brain mask, HM VOI - histogram matching based on tumor mask, ZS brain - z-score based on brain mask, ZS VOI - z-score based on tumor mask

| Wavelet features              | FBN   | FBS1  | FBS2  | HM_brain | HM_VOI | ZS_brain | ZS_VOI |
|-------------------------------|-------|-------|-------|----------|--------|----------|--------|
| mean                          | 0.751 | 0.476 | 0.531 | 0.495    | 0.066  | 0.482    | 0.715  |
| standard deviation            | 0.065 | 0.146 | 0.000 | 0.470    | 0.205  | 0.115    | 0.358  |
| coefficient of variation      | 0.157 | 0.157 | 0.194 | 0.141    | 0.197  | 0.157    | 0.157  |
| skewness                      | 0.034 | 0.034 | 0.037 | 0.232    | 0.013  | 0.034    | 0.034  |
| kurtosis                      | 0.000 | 0.000 | 0.000 | 0.121    | 0.000  | 0.000    | 0.000  |
| variance                      | 0.041 | 0.201 | 0.000 | 0.444    | 0.168  | 0.140    | 0.320  |
| median                        | 0.879 | 0.655 | 0.681 | 0.264    | 0.000  | 0.595    | 0.669  |
| percentile 10th               | 0.000 | 0.000 | 0.000 | 0.169    | 0.218  | 0.000    | 0.241  |
| percentile 90th               | 0.032 | 0.000 | 0.000 | 0.474    | 0.142  | 0.000    | 0.295  |
| interquartile range           | 0.038 | 0.000 | 0.000 | 0.176    | 0.066  | 0.000    | 0.168  |
| range                         | 0.161 | 0.157 | 0.000 | 0.622    | 0.264  | 0.173    | 0.428  |
| mean absolut deviation        | 0.044 | 0.085 | 0.000 | 0.413    | 0.120  | 0.018    | 0.326  |
| robust mean absolut deviation | 0.023 | 0.000 | 0.000 | 0.252    | 0.172  | 0.000    | 0.229  |
| energy                        | 0.000 | 0.261 | 0.000 | 0.636    | 0.761  | 0.334    | 0.519  |
| entropy                       | 0.000 | 0.000 | 0.000 | 0.090    | 0.255  | 0.000    | 0.349  |
| root mean square              | 0.071 | 0.143 | 0.000 | 0.468    | 0.188  | 0.112    | 0.369  |
| uniformity                    | 0.000 | 0.000 | 0.000 | 0.000    | 0.043  | 0.000    | 0.273  |
| energy                        | 0.113 | 0.000 | 0.000 | 0.000    | 0.582  | 0.000    | 0.114  |
| entropy                       | 0.583 | 0.000 | 0.000 | 0.376    | 0.729  | 0.000    | 0.284  |
| contrast                      | 0.671 | 0.287 | 0.051 | 0.466    | 0.317  | 0.221    | 0.246  |
| correlation                   | 0.263 | 0.381 | 0.397 | 0.242    | 0.548  | 0.372    | 0.000  |

|                                       |       |       |       |       |       |       |       |
|---------------------------------------|-------|-------|-------|-------|-------|-------|-------|
| homogeneity                           | 0.000 | 0.000 | 0.000 | 0.284 | 0.161 | 0.000 | 0.274 |
| homogeneity normalized                | 0.636 | 0.466 | 0.481 | 0.873 | 0.704 | 0.602 | 0.390 |
| inverse difference                    | 0.026 | 0.000 | 0.000 | 0.301 | 0.182 | 0.000 | 0.265 |
| inverse difference normalized         | 0.413 | 0.230 | 0.253 | 0.740 | 0.598 | 0.290 | 0.063 |
| variance                              | 0.616 | 0.275 | 0.037 | 0.476 | 0.331 | 0.214 | 0.243 |
| sum of average                        | 0.000 | 0.232 | 0.000 | 0.544 | 0.205 | 0.073 | 0.343 |
| sum of entropy                        | 0.309 | 0.000 | 0.000 | 0.334 | 0.696 | 0.000 | 0.244 |
| sum of variance                       | 0.546 | 0.262 | 0.022 | 0.488 | 0.321 | 0.208 | 0.237 |
| difference entropy                    | 0.054 | 0.076 | 0.000 | 0.319 | 0.572 | 0.024 | 0.216 |
| difference variance                   | 0.734 | 0.286 | 0.032 | 0.462 | 0.379 | 0.243 | 0.189 |
| information measures of correlation 1 | 0.897 | 0.722 | 0.703 | 0.876 | 0.808 | 0.796 | 0.609 |
| information measures of correlation 2 | 0.534 | 0.378 | 0.322 | 0.562 | 0.499 | 0.467 | 0.379 |
| maximal correlation coefficient       | 0.871 | 0.549 | 0.588 | 0.758 | 0.840 | 0.651 | 0.432 |
| joint maximum                         | 0.000 | 0.000 | 0.000 | 0.000 | 0.326 | 0.000 | 0.189 |
| joint average                         | 0.000 | 0.232 | 0.000 | 0.544 | 0.203 | 0.073 | 0.343 |
| difference average                    | 0.509 | 0.174 | 0.000 | 0.478 | 0.341 | 0.102 | 0.285 |
| dissimilarity                         | 0.509 | 0.174 | 0.000 | 0.478 | 0.341 | 0.102 | 0.285 |
| inverse variance                      | 0.220 | 0.795 | 0.598 | 0.542 | 0.404 | 0.837 | 0.000 |
| autocorrelation                       | 0.000 | 0.338 | 0.000 | 0.537 | 0.157 | 0.102 | 0.296 |
| cluster tendency                      | 0.546 | 0.262 | 0.022 | 0.488 | 0.321 | 0.208 | 0.237 |
| cluster shade                         | 0.520 | 0.703 | 0.714 | 0.078 | 0.000 | 0.592 | 0.390 |
| cluster prominence                    | 0.473 | 0.190 | 0.000 | 0.446 | 0.236 | 0.126 | 0.208 |
| energy                                | 0.000 | 0.000 | 0.000 | 0.000 | 0.038 | 0.000 | 0.096 |
| entropy                               | 0.000 | 0.000 | 0.000 | 0.180 | 0.224 | 0.000 | 0.265 |
| contrast                              | 0.657 | 0.288 | 0.047 | 0.471 | 0.336 | 0.222 | 0.245 |
| correlation                           | 0.226 | 0.349 | 0.361 | 0.265 | 0.530 | 0.382 | 0.000 |
| homogeneity                           | 0.000 | 0.000 | 0.000 | 0.287 | 0.098 | 0.000 | 0.272 |
| homogeneity normalized                | 0.628 | 0.462 | 0.474 | 0.870 | 0.722 | 0.597 | 0.382 |
| inverse difference                    | 0.013 | 0.000 | 0.000 | 0.303 | 0.123 | 0.000 | 0.263 |
| inverse difference normalized         | 0.401 | 0.209 | 0.231 | 0.740 | 0.599 | 0.272 | 0.052 |
| variance                              | 0.618 | 0.275 | 0.036 | 0.478 | 0.358 | 0.215 | 0.241 |
| sum of average                        | 0.000 | 0.231 | 0.000 | 0.545 | 0.211 | 0.075 | 0.344 |
| sum of entropy                        | 0.000 | 0.000 | 0.000 | 0.380 | 0.348 | 0.000 | 0.211 |
| sum of variance                       | 0.569 | 0.261 | 0.023 | 0.485 | 0.384 | 0.207 | 0.235 |
| difference entropy                    | 0.241 | 0.091 | 0.000 | 0.466 | 0.344 | 0.041 | 0.185 |
| difference variance                   | 0.687 | 0.287 | 0.033 | 0.465 | 0.334 | 0.244 | 0.180 |
| information measures of correlation 1 | 0.863 | 0.263 | 0.443 | 0.498 | 0.334 | 0.183 | 0.169 |
| information measures of correlation 2 | 0.703 | 0.140 | 0.267 | 0.416 | 0.480 | 0.000 | 0.295 |
| maximal correlation coefficient       | 0.738 | 0.289 | 0.494 | 0.056 | 0.278 | 0.286 | 0.118 |
| joint maximum                         | 0.000 | 0.000 | 0.000 | 0.000 | 0.000 | 0.000 | 0.201 |
| joint average                         | 0.000 | 0.231 | 0.000 | 0.545 | 0.211 | 0.075 | 0.344 |
| difference average                    | 0.499 | 0.176 | 0.000 | 0.488 | 0.328 | 0.106 | 0.286 |
| dissimilarity                         | 0.499 | 0.176 | 0.000 | 0.488 | 0.328 | 0.106 | 0.286 |
| inverse variance                      | 0.231 | 0.766 | 0.568 | 0.548 | 0.424 | 0.831 | 0.000 |
| autocorrelation                       | 0.000 | 0.337 | 0.000 | 0.537 | 0.158 | 0.103 | 0.297 |
| cluster tendency                      | 0.569 | 0.261 | 0.023 | 0.485 | 0.384 | 0.207 | 0.235 |

|                                      |       |       |       |       |       |       |       |
|--------------------------------------|-------|-------|-------|-------|-------|-------|-------|
| cluster shade                        | 0.432 | 0.748 | 0.761 | 0.048 | 0.250 | 0.642 | 0.423 |
| cluster prominence                   | 0.481 | 0.187 | 0.000 | 0.450 | 0.280 | 0.125 | 0.213 |
| coarseness                           | 0.888 | 0.679 | 0.673 | 0.699 | 0.801 | 0.523 | 0.672 |
| contrast                             | 0.591 | 0.551 | 0.504 | 0.783 | 0.330 | 0.571 | 0.050 |
| busyness                             | 0.797 | 0.044 | 0.000 | 0.538 | 0.141 | 0.019 | 0.000 |
| complexity                           | 0.000 | 0.147 | 0.000 | 0.390 | 0.158 | 0.161 | 0.392 |
| strength                             | 0.815 | 0.295 | 0.244 | 0.385 | 0.546 | 0.359 | 0.396 |
| grey level non-uniformity            | 0.717 | 0.875 | 0.867 | 0.850 | 0.757 | 0.865 | 0.887 |
| grey level non-uniformity normalized | 0.000 | 0.000 | 0.000 | 0.000 | 0.116 | 0.000 | 0.283 |
| zone size non-uniformity             | 0.959 | 0.801 | 0.797 | 0.980 | 0.967 | 0.900 | 0.933 |
| zone size non-uniformity normalized  | 0.013 | 0.000 | 0.000 | 0.306 | 0.209 | 0.000 | 0.337 |
| short runs emphasis                  | 0.000 | 0.000 | 0.000 | 0.248 | 0.167 | 0.000 | 0.170 |
| long runs emphasis                   | 0.000 | 0.000 | 0.000 | 0.177 | 0.171 | 0.000 | 0.075 |
| low grey level run emphasis          | 0.427 | 0.000 | 0.000 | 0.749 | 0.273 | 0.000 | 0.392 |
| high grey level run emphasis         | 0.015 | 0.331 | 0.000 | 0.543 | 0.211 | 0.115 | 0.342 |
| short run low grey level emphasis    | 0.456 | 0.051 | 0.000 | 0.769 | 0.276 | 0.000 | 0.466 |
| short run high grey level emphasis   | 0.056 | 0.339 | 0.000 | 0.535 | 0.235 | 0.055 | 0.365 |
| long run low grey level emphasis     | 0.360 | 0.000 | 0.000 | 0.707 | 0.193 | 0.000 | 0.233 |
| long run high grey level emphasis    | 0.000 | 0.291 | 0.000 | 0.552 | 0.133 | 0.283 | 0.064 |
| run percentage                       | 0.000 | 0.030 | 0.000 | 0.258 | 0.201 | 0.000 | 0.299 |
| grey level variance                  | 0.543 | 0.184 | 0.000 | 0.437 | 0.182 | 0.140 | 0.304 |
| run length variance                  | 0.000 | 0.104 | 0.038 | 0.174 | 0.192 | 0.000 | 0.186 |
| run entropy                          | 0.000 | 0.289 | 0.150 | 0.285 | 0.633 | 0.307 | 0.687 |
| grey level non-uniformity            | 0.718 | 0.876 | 0.867 | 0.851 | 0.756 | 0.866 | 0.886 |
| grey level non-uniformity normalized | 0.000 | 0.000 | 0.000 | 0.000 | 0.110 | 0.000 | 0.279 |
| zone size non-uniformity             | 0.959 | 0.798 | 0.794 | 0.980 | 0.967 | 0.898 | 0.930 |
| zone size non-uniformity normalized  | 0.013 | 0.000 | 0.000 | 0.298 | 0.195 | 0.000 | 0.312 |
| short runs emphasis                  | 0.000 | 0.000 | 0.000 | 0.262 | 0.175 | 0.000 | 0.173 |
| long runs emphasis                   | 0.000 | 0.000 | 0.000 | 0.187 | 0.177 | 0.000 | 0.096 |
| low grey level run emphasis          | 0.425 | 0.000 | 0.000 | 0.755 | 0.265 | 0.000 | 0.393 |
| high grey level run emphasis         | 0.015 | 0.331 | 0.000 | 0.543 | 0.211 | 0.115 | 0.342 |
| short run low grey level emphasis    | 0.445 | 0.051 | 0.000 | 0.766 | 0.275 | 0.000 | 0.470 |
| short run high grey level emphasis   | 0.056 | 0.339 | 0.000 | 0.535 | 0.235 | 0.057 | 0.364 |
| long run low grey level emphasis     | 0.362 | 0.000 | 0.000 | 0.707 | 0.189 | 0.000 | 0.225 |
| long run high grey level emphasis    | 0.000 | 0.291 | 0.000 | 0.552 | 0.138 | 0.283 | 0.077 |
| run percentage                       | 0.000 | 0.028 | 0.000 | 0.256 | 0.208 | 0.000 | 0.297 |
| grey level variance                  | 0.542 | 0.184 | 0.000 | 0.437 | 0.183 | 0.141 | 0.304 |
| run length variance                  | 0.000 | 0.105 | 0.037 | 0.178 | 0.183 | 0.000 | 0.184 |
| run entropy                          | 0.000 | 0.270 | 0.118 | 0.275 | 0.574 | 0.285 | 0.643 |
| grey level non-uniformity            | 0.929 | 0.725 | 0.651 | 0.861 | 0.924 | 0.863 | 0.660 |
| grey level non-uniformity normalized | 0.000 | 0.034 | 0.000 | 0.525 | 0.314 | 0.057 | 0.549 |
| zone size non-uniformity             | 0.709 | 0.064 | 0.000 | 0.703 | 0.710 | 0.306 | 0.361 |
| zone size non-uniformity normalized  | 0.253 | 0.000 | 0.000 | 0.364 | 0.000 | 0.254 | 0.115 |
| small zone emphasis                  | 0.180 | 0.200 | 0.111 | 0.480 | 0.165 | 0.461 | 0.722 |
| large zone emphasis                  | 0.000 | 0.343 | 0.276 | 0.194 | 0.246 | 0.336 | 0.374 |
| low grey level zone emphasis         | 0.502 | 0.000 | 0.000 | 0.555 | 0.467 | 0.000 | 0.199 |

|                                            |       |       |       |       |       |       |       |
|--------------------------------------------|-------|-------|-------|-------|-------|-------|-------|
| high grey level zone emphasis              | 0.000 | 0.356 | 0.000 | 0.612 | 0.247 | 0.072 | 0.468 |
| small zone low grey level emphasis         | 0.029 | 0.065 | 0.036 | 0.426 | 0.590 | 0.000 | 0.194 |
| small zone high grey level emphasis        | 0.240 | 0.338 | 0.000 | 0.602 | 0.195 | 0.027 | 0.600 |
| large zone low grey level emphasis         | 0.000 | 0.000 | 0.000 | 0.349 | 0.128 | 0.000 | 0.029 |
| large zone high grey level emphasis        | 0.000 | 0.699 | 0.710 | 0.266 | 0.281 | 0.422 | 0.880 |
| zone percentage                            | 0.274 | 0.021 | 0.000 | 0.499 | 0.465 | 0.000 | 0.000 |
| grey level variance                        | 0.613 | 0.107 | 0.000 | 0.408 | 0.204 | 0.164 | 0.709 |
| zone size variance                         | 0.000 | 0.408 | 0.367 | 0.231 | 0.217 | 0.393 | 0.571 |
| zone size entropy                          | 0.683 | 0.078 | 0.000 | 0.475 | 0.830 | 0.288 | 0.336 |
| grey level non-uniformity                  | 0.929 | 0.726 | 0.651 | 0.862 | 0.924 | 0.863 | 0.660 |
| grey level non-uniformity normalized       | 0.000 | 0.032 | 0.000 | 0.524 | 0.309 | 0.057 | 0.549 |
| zone size non-uniformity                   | 0.776 | 0.207 | 0.061 | 0.745 | 0.976 | 0.625 | 0.496 |
| zone size non-uniformity normalized        | 0.746 | 0.389 | 0.304 | 0.622 | 0.599 | 0.257 | 0.221 |
| small distance emphasis                    | 0.734 | 0.441 | 0.345 | 0.621 | 0.661 | 0.257 | 0.241 |
| large distance emphasis                    | 0.827 | 0.465 | 0.345 | 0.598 | 0.722 | 0.136 | 0.241 |
| low grey level zone emphasis               | 0.510 | 0.000 | 0.000 | 0.554 | 0.470 | 0.000 | 0.198 |
| high grey level zone emphasis              | 0.000 | 0.356 | 0.000 | 0.612 | 0.247 | 0.072 | 0.468 |
| small distance low grey level emphasis     | 0.562 | 0.000 | 0.000 | 0.690 | 0.424 | 0.000 | 0.354 |
| small distance high grey level emphasis    | 0.041 | 0.243 | 0.000 | 0.554 | 0.263 | 0.007 | 0.575 |
| large distance low grey level emphasis     | 0.131 | 0.012 | 0.000 | 0.000 | 0.572 | 0.000 | 0.000 |
| large distance high grey level emphasis    | 0.180 | 0.631 | 0.000 | 0.641 | 0.275 | 0.147 | 0.168 |
| zone percentage                            | 0.274 | 0.021 | 0.000 | 0.497 | 0.465 | 0.000 | 0.000 |
| grey level variance                        | 0.613 | 0.107 | 0.000 | 0.408 | 0.204 | 0.164 | 0.709 |
| zone distance variance                     | 0.849 | 0.429 | 0.304 | 0.513 | 0.685 | 0.000 | 0.221 |
| zone distance entropy                      | 0.431 | 0.029 | 0.000 | 0.667 | 0.513 | 0.129 | 0.500 |
| grey level non-uniformity                  | 0.498 | 0.710 | 0.697 | 0.711 | 0.682 | 0.680 | 0.805 |
| grey level non-uniformity normalized       | 0.000 | 0.000 | 0.000 | 0.000 | 0.045 | 0.000 | 0.274 |
| dependence count non-uniformity            | 0.719 | 0.700 | 0.701 | 0.794 | 0.921 | 0.715 | 0.839 |
| dependence count non-uniformity normalized | 0.430 | 0.577 | 0.618 | 0.432 | 0.378 | 0.475 | 0.686 |
| low dependence emphasis                    | 0.242 | 0.000 | 0.000 | 0.411 | 0.269 | 0.000 | 0.106 |
| high dependence emphasis                   | 0.000 | 0.059 | 0.000 | 0.178 | 0.112 | 0.000 | 0.206 |
| low grey level count emphasis              | 0.422 | 0.000 | 0.000 | 0.765 | 0.249 | 0.000 | 0.354 |
| high grey level count emphasis             | 0.018 | 0.331 | 0.000 | 0.539 | 0.201 | 0.123 | 0.328 |
| low dependence low grey level emphasis     | 0.637 | 0.258 | 0.283 | 0.922 | 0.580 | 0.019 | 0.133 |
| low dependence high grey level emphasis    | 0.630 | 0.328 | 0.000 | 0.508 | 0.265 | 0.000 | 0.312 |
| high dependence low grey level emphasis    | 0.000 | 0.000 | 0.000 | 0.476 | 0.000 | 0.000 | 0.177 |
| high dependence high grey level emphasis   | 0.000 | 0.226 | 0.162 | 0.279 | 0.134 | 0.040 | 0.000 |
| grey level variance                        | 0.532 | 0.192 | 0.000 | 0.439 | 0.185 | 0.141 | 0.368 |
| dependence count variance                  | 0.000 | 0.458 | 0.430 | 0.240 | 0.092 | 0.286 | 0.265 |
| dependence count entropy                   | 0.944 | 0.783 | 0.782 | 0.877 | 0.839 | 0.826 | 0.820 |
| dependence count energy                    | 0.887 | 0.734 | 0.737 | 0.736 | 0.685 | 0.728 | 0.791 |
| mean                                       | 0.022 | 0.263 | 0.399 | 0.164 | 0.377 | 0.390 | 0.372 |
| standard deviation                         | 0.000 | 0.570 | 0.661 | 0.662 | 0.563 | 0.679 | 0.529 |
| coefficient of variation                   | 0.018 | 0.018 | 0.017 | 0.000 | 0.020 | 0.018 | 0.018 |



|                                       |       |       |       |       |       |       |       |
|---------------------------------------|-------|-------|-------|-------|-------|-------|-------|
| skewness                              | 0.000 | 0.000 | 0.000 | 0.000 | 0.433 | 0.000 | 0.000 |
| kurtosis                              | 0.345 | 0.345 | 0.343 | 0.374 | 0.000 | 0.345 | 0.345 |
| variance                              | 0.000 | 0.631 | 0.744 | 0.568 | 0.677 | 0.772 | 0.470 |
| median                                | 0.158 | 0.426 | 0.537 | 0.103 | 0.670 | 0.507 | 0.536 |
| percentile 10th                       | 0.000 | 0.216 | 0.416 | 0.820 | 0.423 | 0.576 | 0.362 |
| percentile 90th                       | 0.000 | 0.490 | 0.522 | 0.391 | 0.483 | 0.253 | 0.456 |
| interquartile range                   | 0.000 | 0.474 | 0.579 | 0.690 | 0.288 | 0.484 | 0.399 |
| range                                 | 0.040 | 0.390 | 0.348 | 0.546 | 0.277 | 0.537 | 0.393 |
| mean absolut deviation                | 0.000 | 0.525 | 0.639 | 0.698 | 0.560 | 0.612 | 0.505 |
| robust mean absolut deviation         | 0.000 | 0.440 | 0.557 | 0.689 | 0.524 | 0.472 | 0.483 |
| energy                                | 0.000 | 0.483 | 0.409 | 0.687 | 0.735 | 0.740 | 0.516 |
| entropy                               | 0.152 | 0.371 | 0.439 | 0.778 | 0.384 | 0.381 | 0.480 |
| root mean square                      | 0.000 | 0.570 | 0.661 | 0.663 | 0.545 | 0.680 | 0.530 |
| uniformity                            | 0.351 | 0.297 | 0.324 | 0.839 | 0.272 | 0.407 | 0.439 |
| energy                                | 0.572 | 0.187 | 0.183 | 0.771 | 0.691 | 0.544 | 0.482 |
| entropy                               | 0.828 | 0.378 | 0.370 | 0.820 | 0.838 | 0.528 | 0.566 |
| contrast                              | 0.527 | 0.532 | 0.647 | 0.606 | 0.677 | 0.716 | 0.537 |
| correlation                           | 0.146 | 0.210 | 0.309 | 0.000 | 0.350 | 0.236 | 0.000 |
| homogeneity                           | 0.531 | 0.490 | 0.548 | 0.802 | 0.403 | 0.654 | 0.615 |
| homogeneity normalized                | 0.510 | 0.450 | 0.420 | 0.711 | 0.670 | 0.439 | 0.503 |
| inverese difference                   | 0.530 | 0.498 | 0.552 | 0.795 | 0.445 | 0.654 | 0.633 |
| inverese difference normalized        | 0.502 | 0.514 | 0.502 | 0.693 | 0.631 | 0.485 | 0.488 |
| variance                              | 0.484 | 0.548 | 0.649 | 0.597 | 0.639 | 0.729 | 0.526 |
| sum of average                        | 0.154 | 0.356 | 0.463 | 0.560 | 0.242 | 0.451 | 0.259 |
| sum of entropy                        | 0.575 | 0.391 | 0.394 | 0.764 | 0.818 | 0.598 | 0.579 |
| sum of variance                       | 0.433 | 0.565 | 0.650 | 0.587 | 0.591 | 0.740 | 0.510 |
| difference entropy                    | 0.235 | 0.387 | 0.448 | 0.692 | 0.787 | 0.565 | 0.547 |
| difference variance                   | 0.496 | 0.588 | 0.666 | 0.591 | 0.615 | 0.783 | 0.451 |
| information measures of correlation 1 | 0.906 | 0.880 | 0.936 | 0.952 | 0.788 | 0.880 | 0.881 |
| information measures of correlation 2 | 0.717 | 0.663 | 0.702 | 0.768 | 0.645 | 0.694 | 0.821 |
| maximal correlation coefficient       | 0.832 | 0.815 | 0.846 | 0.752 | 0.772 | 0.831 | 0.868 |
| joint maximum                         | 0.594 | 0.229 | 0.227 | 0.855 | 0.697 | 0.615 | 0.644 |
| joint average                         | 0.154 | 0.356 | 0.463 | 0.560 | 0.242 | 0.451 | 0.259 |
| difference average                    | 0.506 | 0.518 | 0.636 | 0.707 | 0.569 | 0.668 | 0.608 |
| dissimilarity                         | 0.506 | 0.518 | 0.636 | 0.707 | 0.569 | 0.668 | 0.608 |
| inverse variance                      | 0.489 | 0.295 | 0.538 | 0.799 | 0.154 | 0.630 | 0.696 |
| autocorrelation                       | 0.169 | 0.371 | 0.570 | 0.505 | 0.209 | 0.384 | 0.114 |
| cluster tendency                      | 0.433 | 0.565 | 0.650 | 0.587 | 0.591 | 0.740 | 0.510 |
| cluster shade                         | 0.289 | 0.675 | 0.643 | 0.258 | 0.483 | 0.634 | 0.280 |
| cluster prominence                    | 0.405 | 0.566 | 0.577 | 0.346 | 0.688 | 0.803 | 0.246 |
| energy                                | 0.458 | 0.235 | 0.231 | 0.863 | 0.384 | 0.616 | 0.504 |
| entropy                               | 0.325 | 0.436 | 0.490 | 0.792 | 0.538 | 0.494 | 0.563 |
| contrast                              | 0.540 | 0.526 | 0.641 | 0.614 | 0.689 | 0.713 | 0.539 |
| correlation                           | 0.282 | 0.321 | 0.418 | 0.142 | 0.000 | 0.372 | 0.000 |
| homogeneity                           | 0.555 | 0.494 | 0.550 | 0.815 | 0.410 | 0.658 | 0.625 |
| homogeneity normalized                | 0.520 | 0.467 | 0.431 | 0.709 | 0.668 | 0.460 | 0.517 |

|                                       |       |       |       |       |       |       |       |
|---------------------------------------|-------|-------|-------|-------|-------|-------|-------|
| inverse difference                    | 0.550 | 0.500 | 0.551 | 0.807 | 0.447 | 0.660 | 0.640 |
| inverse difference normalized         | 0.512 | 0.533 | 0.516 | 0.696 | 0.588 | 0.503 | 0.496 |
| variance                              | 0.497 | 0.550 | 0.650 | 0.600 | 0.662 | 0.730 | 0.525 |
| sum of average                        | 0.149 | 0.356 | 0.463 | 0.559 | 0.271 | 0.450 | 0.259 |
| sum of entropy                        | 0.329 | 0.468 | 0.508 | 0.784 | 0.512 | 0.618 | 0.559 |
| sum of variance                       | 0.446 | 0.575 | 0.659 | 0.584 | 0.619 | 0.745 | 0.504 |
| difference entropy                    | 0.389 | 0.453 | 0.532 | 0.757 | 0.447 | 0.612 | 0.530 |
| difference variance                   | 0.567 | 0.581 | 0.656 | 0.587 | 0.679 | 0.774 | 0.446 |
| information measures of correlation 1 | 0.692 | 0.490 | 0.630 | 0.691 | 0.214 | 0.409 | 0.463 |
| information measures of correlation 2 | 0.650 | 0.525 | 0.669 | 0.730 | 0.346 | 0.426 | 0.365 |
| maximal correlation coefficient       | 0.330 | 0.333 | 0.411 | 0.192 | 0.000 | 0.133 | 0.291 |
| joint maximum                         | 0.460 | 0.233 | 0.232 | 0.875 | 0.371 | 0.636 | 0.666 |
| joint average                         | 0.149 | 0.356 | 0.463 | 0.559 | 0.271 | 0.450 | 0.259 |
| difference average                    | 0.518 | 0.519 | 0.637 | 0.719 | 0.574 | 0.670 | 0.615 |
| dissimilarity                         | 0.518 | 0.519 | 0.637 | 0.719 | 0.574 | 0.670 | 0.615 |
| inverse variance                      | 0.505 | 0.303 | 0.562 | 0.811 | 0.230 | 0.607 | 0.725 |
| autocorrelation                       | 0.162 | 0.372 | 0.570 | 0.505 | 0.232 | 0.384 | 0.114 |
| cluster tendency                      | 0.446 | 0.575 | 0.659 | 0.584 | 0.619 | 0.745 | 0.504 |
| cluster shade                         | 0.290 | 0.683 | 0.650 | 0.255 | 0.562 | 0.626 | 0.275 |
| cluster prominence                    | 0.412 | 0.598 | 0.614 | 0.319 | 0.718 | 0.795 | 0.229 |
| coarseness                            | 0.956 | 0.781 | 0.780 | 0.913 | 0.893 | 0.894 | 0.865 |
| contrast                              | 0.556 | 0.772 | 0.848 | 0.872 | 0.810 | 0.862 | 0.572 |
| busyness                              | 0.593 | 0.332 | 0.154 | 0.081 | 0.116 | 0.461 | 0.484 |
| complexity                            | 0.000 | 0.459 | 0.533 | 0.578 | 0.612 | 0.706 | 0.275 |
| strength                              | 0.880 | 0.715 | 0.774 | 0.624 | 0.678 | 0.778 | 0.687 |
| grey level non-uniformity             | 0.882 | 0.899 | 0.910 | 0.903 | 0.795 | 0.914 | 0.937 |
| grey level non-uniformity normalized  | 0.310 | 0.288 | 0.330 | 0.834 | 0.290 | 0.269 | 0.301 |
| zone size non-uniformity              | 0.978 | 0.852 | 0.860 | 0.981 | 0.975 | 0.951 | 0.937 |
| zone size non-uniformity normalized   | 0.692 | 0.551 | 0.572 | 0.787 | 0.552 | 0.673 | 0.678 |
| short runs emphasis                   | 0.673 | 0.486 | 0.487 | 0.777 | 0.545 | 0.649 | 0.638 |
| long runs emphasis                    | 0.641 | 0.386 | 0.366 | 0.770 | 0.577 | 0.745 | 0.664 |
| low grey level run emphasis           | 0.398 | 0.313 | 0.121 | 0.317 | 0.505 | 0.050 | 0.569 |
| high grey level run emphasis          | 0.223 | 0.373 | 0.562 | 0.532 | 0.227 | 0.432 | 0.149 |
| short run low grey level emphasis     | 0.405 | 0.395 | 0.209 | 0.330 | 0.532 | 0.079 | 0.590 |
| short run high grey level emphasis    | 0.235 | 0.372 | 0.565 | 0.552 | 0.230 | 0.451 | 0.154 |
| long run low grey level emphasis      | 0.398 | 0.008 | 0.000 | 0.236 | 0.406 | 0.000 | 0.473 |
| long run high grey level emphasis     | 0.182 | 0.359 | 0.541 | 0.416 | 0.230 | 0.340 | 0.127 |
| run percentage                        | 0.674 | 0.522 | 0.526 | 0.790 | 0.586 | 0.714 | 0.732 |
| grey level variance                   | 0.686 | 0.594 | 0.700 | 0.568 | 0.691 | 0.766 | 0.458 |
| run length variance                   | 0.622 | 0.398 | 0.375 | 0.775 | 0.619 | 0.795 | 0.688 |
| run entropy                           | 0.186 | 0.200 | 0.298 | 0.730 | 0.605 | 0.104 | 0.634 |
| grey level non-uniformity             | 0.881 | 0.900 | 0.911 | 0.902 | 0.795 | 0.914 | 0.937 |
| grey level non-uniformity normalized  | 0.310 | 0.289 | 0.330 | 0.832 | 0.281 | 0.272 | 0.295 |
| zone size non-uniformity              | 0.978 | 0.851 | 0.858 | 0.982 | 0.975 | 0.951 | 0.937 |
| zone size non-uniformity normalized   | 0.690 | 0.548 | 0.568 | 0.786 | 0.551 | 0.677 | 0.675 |
| short runs emphasis                   | 0.679 | 0.492 | 0.496 | 0.774 | 0.546 | 0.655 | 0.645 |

|                                         |       |       |       |       |       |       |       |
|-----------------------------------------|-------|-------|-------|-------|-------|-------|-------|
| long runs emphasis                      | 0.647 | 0.402 | 0.384 | 0.767 | 0.585 | 0.726 | 0.672 |
| low grey level run emphasis             | 0.407 | 0.311 | 0.119 | 0.311 | 0.506 | 0.046 | 0.567 |
| high grey level run emphasis            | 0.223 | 0.373 | 0.563 | 0.532 | 0.227 | 0.432 | 0.149 |
| short run low grey level emphasis       | 0.411 | 0.396 | 0.209 | 0.336 | 0.530 | 0.077 | 0.586 |
| short run high grey level emphasis      | 0.236 | 0.374 | 0.567 | 0.552 | 0.229 | 0.451 | 0.153 |
| long run low grey level emphasis        | 0.385 | 0.007 | 0.000 | 0.233 | 0.409 | 0.000 | 0.477 |
| long run high grey level emphasis       | 0.181 | 0.355 | 0.538 | 0.417 | 0.231 | 0.343 | 0.129 |
| run percentage                          | 0.676 | 0.520 | 0.524 | 0.788 | 0.583 | 0.711 | 0.731 |
| grey level variance                     | 0.686 | 0.594 | 0.701 | 0.568 | 0.691 | 0.766 | 0.459 |
| run length variance                     | 0.624 | 0.407 | 0.385 | 0.771 | 0.616 | 0.779 | 0.691 |
| run entropy                             | 0.182 | 0.163 | 0.277 | 0.734 | 0.564 | 0.107 | 0.572 |
| grey level non-uniformity               | 0.948 | 0.892 | 0.942 | 0.891 | 0.924 | 0.760 | 0.363 |
| grey level non-uniformity normalized    | 0.118 | 0.234 | 0.195 | 0.613 | 0.418 | 0.160 | 0.531 |
| zone size non-uniformity                | 0.801 | 0.148 | 0.196 | 0.861 | 0.581 | 0.572 | 0.261 |
| zone size non-uniformity normalized     | 0.727 | 0.409 | 0.450 | 0.000 | 0.011 | 0.000 | 0.345 |
| small zone emphasis                     | 0.712 | 0.412 | 0.406 | 0.000 | 0.037 | 0.000 | 0.610 |
| large zone emphasis                     | 0.483 | 0.494 | 0.489 | 0.584 | 0.209 | 0.709 | 0.526 |
| low grey level zone emphasis            | 0.285 | 0.059 | 0.068 | 0.186 | 0.545 | 0.090 | 0.411 |
| high grey level zone emphasis           | 0.151 | 0.273 | 0.470 | 0.538 | 0.244 | 0.405 | 0.174 |
| small zone low grey level emphasis      | 0.295 | 0.000 | 0.058 | 0.198 | 0.269 | 0.072 | 0.000 |
| small zone high grey level emphasis     | 0.193 | 0.082 | 0.313 | 0.572 | 0.206 | 0.395 | 0.275 |
| large zone low grey level emphasis      | 0.287 | 0.064 | 0.047 | 0.132 | 0.000 | 0.313 | 0.374 |
| large zone high grey level emphasis     | 0.460 | 0.745 | 0.739 | 0.193 | 0.065 | 0.656 | 0.681 |
| zone percentage                         | 0.724 | 0.630 | 0.809 | 0.759 | 0.502 | 0.658 | 0.592 |
| grey level variance                     | 0.634 | 0.419 | 0.414 | 0.567 | 0.684 | 0.660 | 0.447 |
| zone size variance                      | 0.477 | 0.506 | 0.502 | 0.585 | 0.152 | 0.713 | 0.561 |
| zone size entropy                       | 0.766 | 0.563 | 0.563 | 0.754 | 0.886 | 0.345 | 0.642 |
| grey level non-uniformity               | 0.948 | 0.892 | 0.942 | 0.891 | 0.924 | 0.760 | 0.364 |
| grey level non-uniformity normalized    | 0.131 | 0.231 | 0.192 | 0.616 | 0.416 | 0.159 | 0.532 |
| zone size non-uniformity                | 0.891 | 0.431 | 0.518 | 0.875 | 0.963 | 0.592 | 0.494 |
| zone size non-uniformity normalized     | 0.710 | 0.513 | 0.472 | 0.613 | 0.655 | 0.613 | 0.234 |
| small distance emphasis                 | 0.631 | 0.468 | 0.412 | 0.504 | 0.669 | 0.475 | 0.126 |
| large distance emphasis                 | 0.676 | 0.532 | 0.552 | 0.585 | 0.769 | 0.631 | 0.358 |
| low grey level zone emphasis            | 0.291 | 0.059 | 0.071 | 0.186 | 0.547 | 0.091 | 0.409 |
| high grey level zone emphasis           | 0.151 | 0.273 | 0.470 | 0.538 | 0.244 | 0.405 | 0.174 |
| small distance low grey level emphasis  | 0.363 | 0.181 | 0.104 | 0.195 | 0.577 | 0.177 | 0.551 |
| small distance high grey level emphasis | 0.015 | 0.335 | 0.502 | 0.502 | 0.197 | 0.306 | 0.124 |
| large distance low grey level emphasis  | 0.213 | 0.000 | 0.062 | 0.276 | 0.421 | 0.149 | 0.164 |
| large distance high grey level emphasis | 0.481 | 0.110 | 0.333 | 0.556 | 0.375 | 0.522 | 0.188 |
| zone percentage                         | 0.724 | 0.629 | 0.809 | 0.759 | 0.503 | 0.658 | 0.594 |
| grey level variance                     | 0.634 | 0.419 | 0.414 | 0.567 | 0.684 | 0.660 | 0.447 |
| zone distance variance                  | 0.716 | 0.575 | 0.603 | 0.731 | 0.803 | 0.752 | 0.566 |
| zone distance entropy                   | 0.597 | 0.243 | 0.160 | 0.717 | 0.602 | 0.305 | 0.660 |
| grey level non-uniformity               | 0.853 | 0.795 | 0.799 | 0.855 | 0.761 | 0.854 | 0.868 |
| grey level non-uniformity normalized    | 0.339 | 0.295 | 0.323 | 0.838 | 0.270 | 0.407 | 0.439 |
| dependence count non-uniformity         | 0.866 | 0.707 | 0.727 | 0.895 | 0.914 | 0.883 | 0.962 |

|                                            |       |       |       |       |       |       |       |
|--------------------------------------------|-------|-------|-------|-------|-------|-------|-------|
| dependence count non-uniformity normalized | 0.771 | 0.677 | 0.762 | 0.760 | 0.490 | 0.818 | 0.520 |
| low dependence emphasis                    | 0.730 | 0.536 | 0.699 | 0.699 | 0.368 | 0.494 | 0.523 |
| high dependence emphasis                   | 0.599 | 0.394 | 0.375 | 0.782 | 0.538 | 0.712 | 0.728 |
| low grey level count emphasis              | 0.412 | 0.336 | 0.139 | 0.320 | 0.495 | 0.045 | 0.536 |
| high grey level count emphasis             | 0.228 | 0.377 | 0.567 | 0.532 | 0.225 | 0.432 | 0.142 |
| low dependence low grey level emphasis     | 0.464 | 0.596 | 0.619 | 0.553 | 0.756 | 0.451 | 0.370 |
| low dependence high grey level emphasis    | 0.486 | 0.309 | 0.569 | 0.688 | 0.273 | 0.656 | 0.239 |
| high dependence low grey level emphasis    | 0.220 | 0.000 | 0.000 | 0.211 | 0.000 | 0.106 | 0.433 |
| high dependence high grey level emphasis   | 0.422 | 0.401 | 0.419 | 0.064 | 0.198 | 0.243 | 0.244 |
| grey level variance                        | 0.686 | 0.601 | 0.709 | 0.576 | 0.695 | 0.773 | 0.481 |
| dependence count variance                  | 0.590 | 0.412 | 0.393 | 0.809 | 0.595 | 0.808 | 0.824 |
| dependence count entropy                   | 0.849 | 0.680 | 0.659 | 0.800 | 0.950 | 0.652 | 0.647 |
| dependence count energy                    | 0.608 | 0.464 | 0.460 | 0.557 | 0.970 | 0.354 | 0.354 |
| mean                                       | 0.141 | 0.345 | 0.376 | 0.311 | 0.094 | 0.355 | 0.322 |
| standard deviation                         | 0.137 | 0.000 | 0.000 | 0.234 | 0.482 | 0.000 | 0.547 |
| coefficient of variation                   | 0.000 | 0.000 | 0.000 | 0.140 | 0.139 | 0.000 | 0.000 |
| skewness                                   | 0.700 | 0.700 | 0.699 | 0.640 | 0.202 | 0.700 | 0.700 |
| kurtosis                                   | 0.265 | 0.265 | 0.264 | 0.533 | 0.179 | 0.265 | 0.265 |
| variance                                   | 0.078 | 0.042 | 0.000 | 0.309 | 0.636 | 0.037 | 0.662 |
| median                                     | 0.025 | 0.246 | 0.162 | 0.005 | 0.356 | 0.188 | 0.000 |
| percentile 10th                            | 0.000 | 0.000 | 0.000 | 0.301 | 0.000 | 0.000 | 0.000 |
| percentile 90th                            | 0.093 | 0.055 | 0.011 | 0.000 | 0.000 | 0.000 | 0.444 |
| interquartile range                        | 0.000 | 0.000 | 0.000 | 0.217 | 0.000 | 0.000 | 0.198 |
| range                                      | 0.288 | 0.093 | 0.000 | 0.679 | 0.698 | 0.186 | 0.605 |
| mean absolut deviation                     | 0.059 | 0.000 | 0.000 | 0.140 | 0.219 | 0.000 | 0.390 |
| robust mean absolut deviation              | 0.000 | 0.000 | 0.000 | 0.040 | 0.000 | 0.000 | 0.151 |
| energy                                     | 0.011 | 0.309 | 0.000 | 0.814 | 0.637 | 0.472 | 0.618 |
| entropy                                    | 0.000 | 0.000 | 0.000 | 0.094 | 0.204 | 0.000 | 0.233 |
| root mean square                           | 0.137 | 0.000 | 0.000 | 0.228 | 0.510 | 0.000 | 0.554 |
| uniformity                                 | 0.000 | 0.000 | 0.000 | 0.000 | 0.000 | 0.000 | 0.055 |
| energy                                     | 0.465 | 0.000 | 0.000 | 0.071 | 0.514 | 0.000 | 0.029 |
| entropy                                    | 0.686 | 0.043 | 0.000 | 0.557 | 0.729 | 0.048 | 0.267 |
| contrast                                   | 0.755 | 0.055 | 0.000 | 0.273 | 0.506 | 0.036 | 0.671 |
| correlation                                | 0.338 | 0.458 | 0.490 | 0.218 | 0.102 | 0.469 | 0.000 |
| homogeneity                                | 0.075 | 0.000 | 0.000 | 0.000 | 0.000 | 0.000 | 0.063 |
| homogeneity normalized                     | 0.711 | 0.728 | 0.737 | 0.765 | 0.682 | 0.637 | 0.000 |
| inverese difference                        | 0.141 | 0.000 | 0.000 | 0.000 | 0.000 | 0.000 | 0.034 |
| inverese difference normalized             | 0.519 | 0.430 | 0.449 | 0.656 | 0.592 | 0.245 | 0.000 |
| variance                                   | 0.734 | 0.043 | 0.000 | 0.267 | 0.447 | 0.022 | 0.687 |
| sum of average                             | 0.648 | 0.262 | 0.115 | 0.649 | 0.616 | 0.201 | 0.308 |
| sum of entropy                             | 0.451 | 0.045 | 0.000 | 0.448 | 0.609 | 0.000 | 0.316 |
| sum of variance                            | 0.705 | 0.031 | 0.000 | 0.258 | 0.375 | 0.007 | 0.697 |
| difference entropy                         | 0.096 | 0.032 | 0.000 | 0.339 | 0.529 | 0.000 | 0.353 |
| difference variance                        | 0.826 | 0.113 | 0.000 | 0.436 | 0.588 | 0.155 | 0.737 |

|                                       |       |       |       |       |       |       |       |
|---------------------------------------|-------|-------|-------|-------|-------|-------|-------|
| information measures of correlation 1 | 0.882 | 0.476 | 0.556 | 0.833 | 0.769 | 0.780 | 0.705 |
| information measures of correlation 2 | 0.693 | 0.261 | 0.237 | 0.534 | 0.431 | 0.532 | 0.814 |
| maximal correlation coefficient       | 0.818 | 0.305 | 0.286 | 0.735 | 0.843 | 0.614 | 0.674 |
| joint maximum                         | 0.211 | 0.061 | 0.016 | 0.000 | 0.373 | 0.000 | 0.048 |
| joint average                         | 0.648 | 0.262 | 0.115 | 0.649 | 0.616 | 0.201 | 0.308 |
| difference average                    | 0.599 | 0.017 | 0.000 | 0.143 | 0.244 | 0.000 | 0.331 |
| dissimilarity                         | 0.599 | 0.017 | 0.000 | 0.143 | 0.244 | 0.000 | 0.331 |
| inverse variance                      | 0.347 | 0.088 | 0.000 | 0.295 | 0.117 | 0.781 | 0.007 |
| autocorrelation                       | 0.578 | 0.274 | 0.104 | 0.730 | 0.646 | 0.226 | 0.130 |
| cluster tendency                      | 0.705 | 0.031 | 0.000 | 0.258 | 0.375 | 0.007 | 0.697 |
| cluster shade                         | 0.553 | 0.236 | 0.395 | 0.356 | 0.718 | 0.294 | 0.937 |
| cluster prominence                    | 0.744 | 0.071 | 0.000 | 0.416 | 0.656 | 0.121 | 0.872 |
| energy                                | 0.000 | 0.000 | 0.000 | 0.000 | 0.016 | 0.000 | 0.000 |
| entropy                               | 0.000 | 0.000 | 0.000 | 0.082 | 0.224 | 0.000 | 0.327 |
| contrast                              | 0.754 | 0.057 | 0.000 | 0.274 | 0.571 | 0.039 | 0.670 |
| correlation                           | 0.442 | 0.600 | 0.618 | 0.249 | 0.010 | 0.534 | 0.000 |
| homogeneity                           | 0.087 | 0.000 | 0.000 | 0.000 | 0.000 | 0.000 | 0.060 |
| homogeneity normalized                | 0.712 | 0.744 | 0.752 | 0.771 | 0.698 | 0.662 | 0.000 |
| inverse difference                    | 0.147 | 0.000 | 0.000 | 0.000 | 0.000 | 0.000 | 0.033 |
| inverse difference normalized         | 0.521 | 0.464 | 0.484 | 0.651 | 0.608 | 0.272 | 0.000 |
| variance                              | 0.730 | 0.042 | 0.000 | 0.269 | 0.534 | 0.024 | 0.688 |
| sum of average                        | 0.647 | 0.263 | 0.116 | 0.649 | 0.618 | 0.200 | 0.308 |
| sum of entropy                        | 0.205 | 0.000 | 0.000 | 0.002 | 0.131 | 0.000 | 0.214 |
| sum of variance                       | 0.697 | 0.030 | 0.000 | 0.262 | 0.487 | 0.006 | 0.700 |
| difference entropy                    | 0.456 | 0.000 | 0.000 | 0.128 | 0.110 | 0.000 | 0.250 |
| difference variance                   | 0.863 | 0.105 | 0.000 | 0.370 | 0.703 | 0.138 | 0.725 |
| information measures of correlation 1 | 0.680 | 0.000 | 0.000 | 0.378 | 0.423 | 0.010 | 0.000 |
| information measures of correlation 2 | 0.644 | 0.000 | 0.000 | 0.361 | 0.445 | 0.048 | 0.138 |
| maximal correlation coefficient       | 0.000 | 0.000 | 0.000 | 0.369 | 0.194 | 0.000 | 0.000 |
| joint maximum                         | 0.000 | 0.066 | 0.029 | 0.000 | 0.000 | 0.000 | 0.057 |
| joint average                         | 0.647 | 0.263 | 0.116 | 0.649 | 0.618 | 0.200 | 0.308 |
| difference average                    | 0.602 | 0.020 | 0.000 | 0.148 | 0.284 | 0.000 | 0.326 |
| dissimilarity                         | 0.602 | 0.020 | 0.000 | 0.148 | 0.284 | 0.000 | 0.326 |
| inverse variance                      | 0.349 | 0.064 | 0.000 | 0.336 | 0.124 | 0.787 | 0.028 |
| autocorrelation                       | 0.576 | 0.274 | 0.104 | 0.729 | 0.655 | 0.226 | 0.130 |
| cluster tendency                      | 0.697 | 0.030 | 0.000 | 0.262 | 0.487 | 0.006 | 0.700 |
| cluster shade                         | 0.574 | 0.248 | 0.393 | 0.335 | 0.635 | 0.292 | 0.943 |
| cluster prominence                    | 0.766 | 0.072 | 0.000 | 0.419 | 0.763 | 0.124 | 0.885 |
| coarseness                            | 0.930 | 0.895 | 0.898 | 0.664 | 0.712 | 0.913 | 0.750 |
| contrast                              | 0.609 | 0.237 | 0.342 | 0.210 | 0.739 | 0.082 | 0.325 |
| busyness                              | 0.663 | 0.000 | 0.000 | 0.516 | 0.087 | 0.000 | 0.008 |
| complexity                            | 0.000 | 0.295 | 0.000 | 0.551 | 0.680 | 0.412 | 0.477 |
| strength                              | 0.882 | 0.131 | 0.024 | 0.210 | 0.513 | 0.219 | 0.775 |
| grey level non-uniformity             | 0.702 | 0.822 | 0.827 | 0.862 | 0.786 | 0.868 | 0.897 |
| grey level non-uniformity normalized  | 0.000 | 0.000 | 0.000 | 0.000 | 0.000 | 0.000 | 0.072 |
| zone size non-uniformity              | 0.964 | 0.897 | 0.925 | 0.988 | 0.956 | 0.939 | 0.956 |

|                                      |       |       |       |       |       |       |       |
|--------------------------------------|-------|-------|-------|-------|-------|-------|-------|
| zone size non-uniformity normalized  | 0.046 | 0.056 | 0.052 | 0.000 | 0.239 | 0.000 | 0.038 |
| short runs emphasis                  | 0.002 | 0.000 | 0.000 | 0.000 | 0.190 | 0.000 | 0.000 |
| long runs emphasis                   | 0.000 | 0.095 | 0.056 | 0.000 | 0.189 | 0.000 | 0.000 |
| low grey level run emphasis          | 0.677 | 0.164 | 0.158 | 0.317 | 0.366 | 0.168 | 0.348 |
| high grey level run emphasis         | 0.563 | 0.250 | 0.078 | 0.710 | 0.664 | 0.219 | 0.137 |
| short run low grey level emphasis    | 0.700 | 0.213 | 0.214 | 0.347 | 0.413 | 0.222 | 0.510 |
| short run high grey level emphasis   | 0.537 | 0.207 | 0.029 | 0.696 | 0.657 | 0.210 | 0.135 |
| long run low grey level emphasis     | 0.605 | 0.026 | 0.001 | 0.253 | 0.248 | 0.065 | 0.126 |
| long run high grey level emphasis    | 0.620 | 0.471 | 0.356 | 0.751 | 0.689 | 0.247 | 0.153 |
| run percentage                       | 0.024 | 0.112 | 0.101 | 0.000 | 0.232 | 0.000 | 0.000 |
| grey level variance                  | 0.663 | 0.066 | 0.000 | 0.310 | 0.626 | 0.094 | 0.688 |
| run length variance                  | 0.000 | 0.194 | 0.161 | 0.000 | 0.240 | 0.000 | 0.131 |
| run entropy                          | 0.243 | 0.092 | 0.000 | 0.440 | 0.491 | 0.284 | 0.577 |
| grey level non-uniformity            | 0.703 | 0.822 | 0.826 | 0.864 | 0.786 | 0.869 | 0.897 |
| grey level non-uniformity normalized | 0.000 | 0.000 | 0.000 | 0.000 | 0.000 | 0.000 | 0.068 |
| zone size non-uniformity             | 0.964 | 0.894 | 0.923 | 0.988 | 0.956 | 0.938 | 0.955 |
| zone size non-uniformity normalized  | 0.048 | 0.036 | 0.031 | 0.000 | 0.239 | 0.000 | 0.000 |
| short runs emphasis                  | 0.026 | 0.020 | 0.000 | 0.000 | 0.213 | 0.000 | 0.000 |
| long runs emphasis                   | 0.000 | 0.134 | 0.103 | 0.000 | 0.214 | 0.000 | 0.000 |
| low grey level run emphasis          | 0.680 | 0.162 | 0.156 | 0.321 | 0.364 | 0.168 | 0.349 |
| high grey level run emphasis         | 0.563 | 0.250 | 0.078 | 0.710 | 0.664 | 0.219 | 0.137 |
| short run low grey level emphasis    | 0.700 | 0.215 | 0.214 | 0.342 | 0.410 | 0.219 | 0.485 |
| short run high grey level emphasis   | 0.537 | 0.208 | 0.030 | 0.696 | 0.656 | 0.210 | 0.134 |
| long run low grey level emphasis     | 0.607 | 0.028 | 0.003 | 0.254 | 0.252 | 0.067 | 0.152 |
| long run high grey level emphasis    | 0.621 | 0.459 | 0.342 | 0.751 | 0.691 | 0.247 | 0.158 |
| run percentage                       | 0.022 | 0.113 | 0.100 | 0.000 | 0.241 | 0.000 | 0.000 |
| grey level variance                  | 0.662 | 0.066 | 0.000 | 0.310 | 0.626 | 0.094 | 0.687 |
| run length variance                  | 0.000 | 0.208 | 0.178 | 0.000 | 0.235 | 0.000 | 0.034 |
| run entropy                          | 0.225 | 0.065 | 0.000 | 0.443 | 0.392 | 0.296 | 0.598 |
| grey level non-uniformity            | 0.884 | 0.708 | 0.819 | 0.858 | 0.875 | 0.706 | 0.807 |
| grey level non-uniformity normalized | 0.361 | 0.000 | 0.000 | 0.310 | 0.195 | 0.153 | 0.112 |
| zone size non-uniformity             | 0.682 | 0.312 | 0.379 | 0.833 | 0.846 | 0.550 | 0.596 |
| zone size non-uniformity normalized  | 0.488 | 0.335 | 0.197 | 0.000 | 0.280 | 0.133 | 0.000 |
| small zone emphasis                  | 0.439 | 0.164 | 0.154 | 0.000 | 0.501 | 0.167 | 0.304 |
| large zone emphasis                  | 0.019 | 0.369 | 0.380 | 0.443 | 0.182 | 0.374 | 0.337 |
| low grey level zone emphasis         | 0.891 | 0.102 | 0.195 | 0.350 | 0.620 | 0.040 | 0.210 |
| high grey level zone emphasis        | 0.543 | 0.130 | 0.000 | 0.732 | 0.632 | 0.268 | 0.229 |
| small zone low grey level emphasis   | 0.261 | 0.000 | 0.000 | 0.717 | 0.000 | 0.240 | 0.457 |
| small zone high grey level emphasis  | 0.550 | 0.101 | 0.000 | 0.698 | 0.506 | 0.173 | 0.307 |
| large zone low grey level emphasis   | 0.000 | 0.037 | 0.035 | 0.077 | 0.026 | 0.000 | 0.000 |
| large zone high grey level emphasis  | 0.109 | 0.613 | 0.626 | 0.872 | 0.263 | 0.539 | 0.646 |
| zone percentage                      | 0.364 | 0.025 | 0.183 | 0.187 | 0.481 | 0.084 | 0.240 |
| grey level variance                  | 0.744 | 0.245 | 0.000 | 0.401 | 0.488 | 0.331 | 0.664 |
| zone size variance                   | 0.002 | 0.414 | 0.424 | 0.479 | 0.141 | 0.462 | 0.450 |
| zone size entropy                    | 0.766 | 0.194 | 0.172 | 0.545 | 0.666 | 0.274 | 0.448 |
| grey level non-uniformity            | 0.884 | 0.708 | 0.819 | 0.859 | 0.875 | 0.706 | 0.807 |

|                                            |       |       |       |       |       |       |       |
|--------------------------------------------|-------|-------|-------|-------|-------|-------|-------|
| grey level non-uniformity normalized       | 0.350 | 0.000 | 0.000 | 0.308 | 0.193 | 0.154 | 0.114 |
| zone size non-uniformity                   | 0.688 | 0.136 | 0.206 | 0.859 | 0.926 | 0.531 | 0.702 |
| zone size non-uniformity normalized        | 0.484 | 0.377 | 0.364 | 0.604 | 0.796 | 0.396 | 0.651 |
| small distance emphasis                    | 0.429 | 0.305 | 0.281 | 0.550 | 0.777 | 0.376 | 0.572 |
| large distance emphasis                    | 0.405 | 0.294 | 0.284 | 0.538 | 0.750 | 0.294 | 0.483 |
| low grey level zone emphasis               | 0.892 | 0.102 | 0.195 | 0.350 | 0.618 | 0.038 | 0.210 |
| high grey level zone emphasis              | 0.543 | 0.130 | 0.000 | 0.732 | 0.632 | 0.268 | 0.229 |
| small distance low grey level emphasis     | 0.909 | 0.203 | 0.299 | 0.406 | 0.664 | 0.125 | 0.163 |
| small distance high grey level emphasis    | 0.529 | 0.038 | 0.000 | 0.697 | 0.650 | 0.232 | 0.195 |
| large distance low grey level emphasis     | 0.180 | 0.000 | 0.000 | 0.176 | 0.305 | 0.000 | 0.324 |
| large distance high grey level emphasis    | 0.636 | 0.278 | 0.058 | 0.815 | 0.562 | 0.318 | 0.208 |
| zone percentage                            | 0.364 | 0.024 | 0.183 | 0.188 | 0.482 | 0.085 | 0.240 |
| grey level variance                        | 0.744 | 0.245 | 0.000 | 0.402 | 0.488 | 0.331 | 0.664 |
| zone distance variance                     | 0.497 | 0.348 | 0.357 | 0.533 | 0.727 | 0.191 | 0.383 |
| zone distance entropy                      | 0.744 | 0.274 | 0.198 | 0.665 | 0.550 | 0.456 | 0.559 |
| grey level non-uniformity                  | 0.621 | 0.797 | 0.801 | 0.751 | 0.739 | 0.744 | 0.817 |
| grey level non-uniformity normalized       | 0.000 | 0.000 | 0.000 | 0.000 | 0.000 | 0.000 | 0.056 |
| dependence count non-uniformity            | 0.650 | 0.663 | 0.753 | 0.839 | 0.890 | 0.721 | 0.930 |
| dependence count non-uniformity normalized | 0.393 | 0.393 | 0.470 | 0.160 | 0.370 | 0.101 | 0.458 |
| low dependence emphasis                    | 0.428 | 0.000 | 0.085 | 0.031 | 0.398 | 0.000 | 0.290 |
| high dependence emphasis                   | 0.000 | 0.196 | 0.180 | 0.000 | 0.179 | 0.000 | 0.000 |
| low grey level count emphasis              | 0.648 | 0.167 | 0.156 | 0.326 | 0.344 | 0.163 | 0.364 |
| high grey level count emphasis             | 0.565 | 0.253 | 0.082 | 0.709 | 0.664 | 0.217 | 0.134 |
| low dependence low grey level emphasis     | 0.778 | 0.301 | 0.249 | 0.760 | 0.509 | 0.801 | 0.475 |
| low dependence high grey level emphasis    | 0.418 | 0.050 | 0.000 | 0.568 | 0.474 | 0.202 | 0.327 |
| high dependence low grey level emphasis    | 0.087 | 0.000 | 0.000 | 0.000 | 0.028 | 0.000 | 0.062 |
| high dependence high grey level emphasis   | 0.279 | 0.497 | 0.475 | 0.557 | 0.712 | 0.275 | 0.183 |
| grey level variance                        | 0.638 | 0.062 | 0.000 | 0.293 | 0.632 | 0.058 | 0.673 |
| dependence count variance                  | 0.000 | 0.506 | 0.495 | 0.093 | 0.316 | 0.000 | 0.108 |
| dependence count entropy                   | 0.924 | 0.678 | 0.686 | 0.884 | 0.915 | 0.686 | 0.649 |
| dependence count energy                    | 0.825 | 0.487 | 0.501 | 0.735 | 0.853 | 0.392 | 0.399 |
| mean                                       | 0.158 | 0.918 | 0.918 | 0.837 | 0.672 | 0.953 | 0.851 |
| standard deviation                         | 0.000 | 0.604 | 0.754 | 0.885 | 0.729 | 0.757 | 0.243 |
| coefficient of variation                   | 0.000 | 0.000 | 0.000 | 0.000 | 0.000 | 0.000 | 0.000 |
| skewness                                   | 0.573 | 0.573 | 0.571 | 0.604 | 0.451 | 0.573 | 0.573 |
| kurtosis                                   | 0.511 | 0.511 | 0.505 | 0.680 | 0.814 | 0.511 | 0.511 |
| variance                                   | 0.000 | 0.657 | 0.797 | 0.903 | 0.655 | 0.771 | 0.245 |
| median                                     | 0.000 | 0.503 | 0.525 | 0.406 | 0.481 | 0.428 | 0.284 |
| percentile 10th                            | 0.078 | 0.725 | 0.789 | 0.932 | 0.492 | 0.923 | 0.717 |
| percentile 90th                            | 0.000 | 0.847 | 0.884 | 0.723 | 0.908 | 0.809 | 0.707 |
| interquartile range                        | 0.000 | 0.680 | 0.751 | 0.736 | 0.704 | 0.787 | 0.547 |
| range                                      | 0.000 | 0.164 | 0.439 | 0.605 | 0.672 | 0.369 | 0.365 |
| mean absolut deviation                     | 0.000 | 0.699 | 0.802 | 0.888 | 0.832 | 0.847 | 0.566 |
| robust mean absolut deviation              | 0.007 | 0.734 | 0.813 | 0.811 | 0.855 | 0.866 | 0.670 |

|                                       |       |       |       |       |       |       |       |
|---------------------------------------|-------|-------|-------|-------|-------|-------|-------|
| energy                                | 0.000 | 0.219 | 0.407 | 0.687 | 0.912 | 0.530 | 0.651 |
| entropy                               | 0.496 | 0.512 | 0.641 | 0.769 | 0.302 | 0.662 | 0.376 |
| root mean square                      | 0.000 | 0.617 | 0.757 | 0.887 | 0.813 | 0.778 | 0.279 |
| uniformity                            | 0.466 | 0.549 | 0.615 | 0.738 | 0.123 | 0.688 | 0.536 |
| energy                                | 0.619 | 0.494 | 0.474 | 0.667 | 0.675 | 0.652 | 0.634 |
| entropy                               | 0.828 | 0.511 | 0.530 | 0.867 | 0.872 | 0.696 | 0.623 |
| contrast                              | 0.649 | 0.720 | 0.825 | 0.901 | 0.416 | 0.839 | 0.456 |
| correlation                           | 0.761 | 0.752 | 0.749 | 0.599 | 0.429 | 0.759 | 0.695 |
| homogeneity                           | 0.709 | 0.691 | 0.743 | 0.840 | 0.653 | 0.810 | 0.786 |
| homogeneity normalized                | 0.721 | 0.784 | 0.784 | 0.740 | 0.793 | 0.746 | 0.649 |
| inverse difference                    | 0.738 | 0.698 | 0.756 | 0.850 | 0.716 | 0.816 | 0.783 |
| inverse difference normalized         | 0.782 | 0.806 | 0.804 | 0.780 | 0.860 | 0.800 | 0.725 |
| variance                              | 0.695 | 0.692 | 0.826 | 0.914 | 0.455 | 0.814 | 0.434 |
| sum of average                        | 0.715 | 0.125 | 0.412 | 0.637 | 0.590 | 0.531 | 0.508 |
| sum of entropy                        | 0.661 | 0.381 | 0.452 | 0.740 | 0.797 | 0.563 | 0.520 |
| sum of variance                       | 0.765 | 0.647 | 0.820 | 0.911 | 0.469 | 0.773 | 0.430 |
| difference entropy                    | 0.444 | 0.471 | 0.593 | 0.627 | 0.777 | 0.573 | 0.293 |
| difference variance                   | 0.907 | 0.564 | 0.779 | 0.910 | 0.336 | 0.678 | 0.000 |
| information measures of correlation 1 | 0.928 | 0.895 | 0.923 | 0.937 | 0.912 | 0.920 | 0.878 |
| information measures of correlation 2 | 0.854 | 0.673 | 0.732 | 0.786 | 0.738 | 0.778 | 0.842 |
| maximal correlation coefficient       | 0.953 | 0.778 | 0.863 | 0.912 | 0.876 | 0.847 | 0.783 |
| joint maximum                         | 0.599 | 0.475 | 0.418 | 0.865 | 0.514 | 0.667 | 0.782 |
| joint average                         | 0.715 | 0.125 | 0.412 | 0.637 | 0.589 | 0.531 | 0.508 |
| difference average                    | 0.751 | 0.732 | 0.820 | 0.890 | 0.607 | 0.860 | 0.657 |
| dissimilarity                         | 0.751 | 0.732 | 0.820 | 0.890 | 0.607 | 0.860 | 0.657 |
| inverse variance                      | 0.752 | 0.697 | 0.764 | 0.765 | 0.395 | 0.800 | 0.465 |
| autocorrelation                       | 0.708 | 0.177 | 0.432 | 0.518 | 0.646 | 0.445 | 0.394 |
| cluster tendency                      | 0.765 | 0.647 | 0.820 | 0.911 | 0.469 | 0.773 | 0.430 |
| cluster shade                         | 0.557 | 0.037 | 0.014 | 0.529 | 0.486 | 0.365 | 0.432 |
| cluster prominence                    | 0.432 | 0.503 | 0.661 | 0.721 | 0.260 | 0.498 | 0.110 |
| energy                                | 0.535 | 0.635 | 0.624 | 0.770 | 0.187 | 0.817 | 0.736 |
| entropy                               | 0.502 | 0.554 | 0.668 | 0.742 | 0.482 | 0.681 | 0.557 |
| contrast                              | 0.667 | 0.719 | 0.830 | 0.908 | 0.369 | 0.841 | 0.476 |
| correlation                           | 0.783 | 0.795 | 0.795 | 0.593 | 0.183 | 0.781 | 0.724 |
| homogeneity                           | 0.723 | 0.693 | 0.745 | 0.846 | 0.629 | 0.812 | 0.818 |
| homogeneity normalized                | 0.740 | 0.803 | 0.804 | 0.753 | 0.817 | 0.764 | 0.663 |
| inverse difference                    | 0.752 | 0.700 | 0.757 | 0.857 | 0.689 | 0.819 | 0.819 |
| inverse difference normalized         | 0.802 | 0.822 | 0.821 | 0.795 | 0.865 | 0.820 | 0.748 |
| variance                              | 0.693 | 0.694 | 0.827 | 0.912 | 0.430 | 0.817 | 0.436 |
| sum of average                        | 0.717 | 0.126 | 0.413 | 0.637 | 0.587 | 0.531 | 0.507 |
| sum of entropy                        | 0.807 | 0.599 | 0.713 | 0.833 | 0.385 | 0.761 | 0.621 |
| sum of variance                       | 0.728 | 0.662 | 0.822 | 0.907 | 0.500 | 0.786 | 0.415 |
| difference entropy                    | 0.845 | 0.642 | 0.761 | 0.855 | 0.484 | 0.791 | 0.510 |
| difference variance                   | 0.756 | 0.615 | 0.801 | 0.922 | 0.220 | 0.751 | 0.007 |
| information measures of correlation 1 | 0.884 | 0.838 | 0.881 | 0.804 | 0.792 | 0.821 | 0.440 |
| information measures of correlation 2 | 0.850 | 0.714 | 0.812 | 0.801 | 0.748 | 0.746 | 0.361 |



|                                      |       |       |       |       |       |       |       |
|--------------------------------------|-------|-------|-------|-------|-------|-------|-------|
| maximal correlation coefficient      | 0.499 | 0.504 | 0.646 | 0.150 | 0.361 | 0.561 | 0.520 |
| joint maximum                        | 0.460 | 0.512 | 0.505 | 0.910 | 0.105 | 0.625 | 0.828 |
| joint average                        | 0.717 | 0.126 | 0.413 | 0.637 | 0.587 | 0.531 | 0.507 |
| difference average                   | 0.772 | 0.728 | 0.822 | 0.899 | 0.567 | 0.858 | 0.686 |
| dissimilarity                        | 0.772 | 0.728 | 0.822 | 0.899 | 0.567 | 0.858 | 0.686 |
| inverse variance                     | 0.752 | 0.692 | 0.768 | 0.778 | 0.400 | 0.796 | 0.457 |
| autocorrelation                      | 0.716 | 0.179 | 0.433 | 0.517 | 0.645 | 0.445 | 0.393 |
| cluster tendency                     | 0.728 | 0.662 | 0.822 | 0.907 | 0.500 | 0.786 | 0.415 |
| cluster shade                        | 0.528 | 0.058 | 0.037 | 0.498 | 0.567 | 0.327 | 0.418 |
| cluster prominence                   | 0.455 | 0.491 | 0.633 | 0.757 | 0.274 | 0.482 | 0.100 |
| coarseness                           | 0.882 | 0.920 | 0.909 | 0.813 | 0.563 | 0.942 | 0.937 |
| contrast                             | 0.354 | 0.805 | 0.834 | 0.600 | 0.492 | 0.937 | 0.430 |
| busyness                             | 0.663 | 0.021 | 0.016 | 0.699 | 0.000 | 0.518 | 0.011 |
| complexity                           | 0.635 | 0.377 | 0.595 | 0.843 | 0.421 | 0.574 | 0.071 |
| strength                             | 0.917 | 0.645 | 0.804 | 0.847 | 0.690 | 0.735 | 0.249 |
| grey level non-uniformity            | 0.928 | 0.911 | 0.912 | 0.938 | 0.819 | 0.941 | 0.932 |
| grey level non-uniformity normalized | 0.442 | 0.512 | 0.613 | 0.703 | 0.139 | 0.644 | 0.302 |
| zone size non-uniformity             | 0.974 | 0.970 | 0.974 | 0.982 | 0.950 | 0.979 | 0.988 |
| zone size non-uniformity normalized  | 0.757 | 0.692 | 0.748 | 0.861 | 0.713 | 0.763 | 0.883 |
| short runs emphasis                  | 0.752 | 0.680 | 0.726 | 0.841 | 0.705 | 0.749 | 0.875 |
| long runs emphasis                   | 0.727 | 0.714 | 0.722 | 0.785 | 0.710 | 0.754 | 0.875 |
| low grey level run emphasis          | 0.873 | 0.085 | 0.094 | 0.535 | 0.445 | 0.746 | 0.793 |
| high grey level run emphasis         | 0.751 | 0.231 | 0.488 | 0.518 | 0.568 | 0.432 | 0.377 |
| short run low grey level emphasis    | 0.888 | 0.112 | 0.123 | 0.548 | 0.470 | 0.755 | 0.810 |
| short run high grey level emphasis   | 0.738 | 0.260 | 0.514 | 0.525 | 0.551 | 0.427 | 0.377 |
| long run low grey level emphasis     | 0.811 | 0.000 | 0.000 | 0.508 | 0.382 | 0.721 | 0.708 |
| long run high grey level emphasis    | 0.777 | 0.124 | 0.375 | 0.465 | 0.619 | 0.473 | 0.416 |
| run percentage                       | 0.748 | 0.709 | 0.742 | 0.831 | 0.718 | 0.769 | 0.891 |
| grey level variance                  | 0.716 | 0.633 | 0.789 | 0.902 | 0.655 | 0.753 | 0.099 |
| run length variance                  | 0.709 | 0.728 | 0.718 | 0.752 | 0.723 | 0.765 | 0.878 |
| run entropy                          | 0.220 | 0.356 | 0.546 | 0.733 | 0.503 | 0.567 | 0.448 |
| grey level non-uniformity            | 0.929 | 0.911 | 0.912 | 0.938 | 0.819 | 0.941 | 0.932 |
| grey level non-uniformity normalized | 0.438 | 0.512 | 0.613 | 0.704 | 0.136 | 0.642 | 0.311 |
| zone size non-uniformity             | 0.973 | 0.969 | 0.973 | 0.982 | 0.950 | 0.979 | 0.988 |
| zone size non-uniformity normalized  | 0.757 | 0.690 | 0.746 | 0.860 | 0.710 | 0.763 | 0.877 |
| short runs emphasis                  | 0.755 | 0.692 | 0.738 | 0.848 | 0.713 | 0.757 | 0.875 |
| long runs emphasis                   | 0.732 | 0.722 | 0.730 | 0.784 | 0.723 | 0.758 | 0.874 |
| low grey level run emphasis          | 0.870 | 0.087 | 0.096 | 0.529 | 0.445 | 0.744 | 0.792 |
| high grey level run emphasis         | 0.751 | 0.231 | 0.488 | 0.518 | 0.568 | 0.432 | 0.377 |
| short run low grey level emphasis    | 0.883 | 0.107 | 0.118 | 0.537 | 0.462 | 0.754 | 0.807 |
| short run high grey level emphasis   | 0.737 | 0.260 | 0.514 | 0.525 | 0.551 | 0.427 | 0.377 |
| long run low grey level emphasis     | 0.815 | 0.000 | 0.000 | 0.506 | 0.383 | 0.723 | 0.712 |
| long run high grey level emphasis    | 0.778 | 0.124 | 0.375 | 0.465 | 0.621 | 0.473 | 0.420 |
| run percentage                       | 0.744 | 0.711 | 0.744 | 0.831 | 0.721 | 0.767 | 0.893 |
| grey level variance                  | 0.715 | 0.633 | 0.788 | 0.902 | 0.656 | 0.753 | 0.100 |
| run length variance                  | 0.711 | 0.728 | 0.719 | 0.752 | 0.726 | 0.766 | 0.876 |

|                                            |       |       |       |       |       |       |       |
|--------------------------------------------|-------|-------|-------|-------|-------|-------|-------|
| run entropy                                | 0.259 | 0.365 | 0.545 | 0.729 | 0.558 | 0.566 | 0.326 |
| grey level non-uniformity                  | 0.932 | 0.912 | 0.956 | 0.925 | 0.944 | 0.931 | 0.808 |
| grey level non-uniformity normalized       | 0.120 | 0.551 | 0.477 | 0.743 | 0.272 | 0.721 | 0.000 |
| zone size non-uniformity                   | 0.880 | 0.529 | 0.670 | 0.787 | 0.846 | 0.698 | 0.624 |
| zone size non-uniformity normalized        | 0.614 | 0.627 | 0.667 | 0.758 | 0.545 | 0.284 | 0.000 |
| small zone emphasis                        | 0.607 | 0.560 | 0.607 | 0.697 | 0.390 | 0.269 | 0.000 |
| large zone emphasis                        | 0.599 | 0.702 | 0.687 | 0.484 | 0.568 | 0.852 | 0.796 |
| low grey level zone emphasis               | 0.824 | 0.103 | 0.377 | 0.751 | 0.499 | 0.574 | 0.764 |
| high grey level zone emphasis              | 0.679 | 0.173 | 0.465 | 0.499 | 0.522 | 0.307 | 0.363 |
| small zone low grey level emphasis         | 0.078 | 0.000 | 0.379 | 0.668 | 0.594 | 0.314 | 0.368 |
| small zone high grey level emphasis        | 0.404 | 0.233 | 0.543 | 0.387 | 0.424 | 0.176 | 0.171 |
| large zone low grey level emphasis         | 0.348 | 0.083 | 0.010 | 0.659 | 0.077 | 0.671 | 0.334 |
| large zone high grey level emphasis        | 0.648 | 0.835 | 0.832 | 0.163 | 0.513 | 0.897 | 0.865 |
| zone percentage                            | 0.786 | 0.755 | 0.838 | 0.827 | 0.678 | 0.790 | 0.825 |
| grey level variance                        | 0.869 | 0.310 | 0.535 | 0.832 | 0.472 | 0.520 | 0.168 |
| zone size variance                         | 0.559 | 0.731 | 0.714 | 0.440 | 0.507 | 0.867 | 0.800 |
| zone size entropy                          | 0.904 | 0.359 | 0.465 | 0.934 | 0.878 | 0.718 | 0.488 |
| grey level non-uniformity                  | 0.932 | 0.912 | 0.956 | 0.925 | 0.944 | 0.931 | 0.808 |
| grey level non-uniformity normalized       | 0.150 | 0.550 | 0.480 | 0.736 | 0.262 | 0.716 | 0.000 |
| zone size non-uniformity                   | 0.964 | 0.512 | 0.676 | 0.880 | 0.943 | 0.733 | 0.788 |
| zone size non-uniformity normalized        | 0.699 | 0.534 | 0.515 | 0.698 | 0.420 | 0.476 | 0.450 |
| small distance emphasis                    | 0.768 | 0.545 | 0.530 | 0.709 | 0.405 | 0.441 | 0.512 |
| large distance emphasis                    | 0.673 | 0.509 | 0.514 | 0.696 | 0.430 | 0.417 | 0.621 |
| low grey level zone emphasis               | 0.830 | 0.103 | 0.374 | 0.747 | 0.501 | 0.577 | 0.767 |
| high grey level zone emphasis              | 0.679 | 0.173 | 0.465 | 0.499 | 0.522 | 0.307 | 0.363 |
| small distance low grey level emphasis     | 0.862 | 0.208 | 0.411 | 0.811 | 0.528 | 0.758 | 0.811 |
| small distance high grey level emphasis    | 0.636 | 0.121 | 0.421 | 0.540 | 0.495 | 0.308 | 0.316 |
| large distance low grey level emphasis     | 0.743 | 0.059 | 0.358 | 0.340 | 0.325 | 0.088 | 0.535 |
| large distance high grey level emphasis    | 0.700 | 0.260 | 0.520 | 0.406 | 0.581 | 0.245 | 0.488 |
| zone percentage                            | 0.786 | 0.755 | 0.838 | 0.828 | 0.679 | 0.791 | 0.825 |
| grey level variance                        | 0.870 | 0.310 | 0.535 | 0.832 | 0.472 | 0.520 | 0.168 |
| zone distance variance                     | 0.487 | 0.448 | 0.471 | 0.660 | 0.460 | 0.424 | 0.637 |
| zone distance entropy                      | 0.845 | 0.509 | 0.437 | 0.867 | 0.630 | 0.787 | 0.316 |
| grey level non-uniformity                  | 0.901 | 0.901 | 0.901 | 0.903 | 0.809 | 0.925 | 0.916 |
| grey level non-uniformity normalized       | 0.462 | 0.549 | 0.613 | 0.737 | 0.127 | 0.686 | 0.535 |
| dependence count non-uniformity            | 0.837 | 0.619 | 0.729 | 0.872 | 0.925 | 0.824 | 0.967 |
| dependence count non-uniformity normalized | 0.574 | 0.726 | 0.771 | 0.898 | 0.767 | 0.724 | 0.749 |
| low dependence emphasis                    | 0.725 | 0.773 | 0.843 | 0.860 | 0.632 | 0.751 | 0.777 |
| high dependence emphasis                   | 0.715 | 0.703 | 0.695 | 0.753 | 0.738 | 0.723 | 0.884 |
| low grey level count emphasis              | 0.839 | 0.085 | 0.090 | 0.505 | 0.434 | 0.729 | 0.771 |
| high grey level count emphasis             | 0.753 | 0.233 | 0.488 | 0.519 | 0.573 | 0.440 | 0.379 |
| low dependence low grey level emphasis     | 0.685 | 0.442 | 0.471 | 0.792 | 0.748 | 0.861 | 0.869 |
| low dependence high grey level emphasis    | 0.487 | 0.517 | 0.706 | 0.496 | 0.381 | 0.311 | 0.184 |
| high dependence low grey level emphasis    | 0.166 | 0.000 | 0.000 | 0.677 | 0.040 | 0.758 | 0.340 |

|                                          |       |       |       |       |       |       |       |
|------------------------------------------|-------|-------|-------|-------|-------|-------|-------|
| high dependence high grey level emphasis | 0.753 | 0.345 | 0.373 | 0.272 | 0.773 | 0.724 | 0.610 |
| grey level variance                      | 0.699 | 0.651 | 0.796 | 0.907 | 0.662 | 0.771 | 0.226 |
| dependence count variance                | 0.692 | 0.655 | 0.628 | 0.737 | 0.755 | 0.681 | 0.879 |
| dependence count entropy                 | 0.892 | 0.762 | 0.767 | 0.871 | 0.912 | 0.864 | 0.841 |
| dependence count energy                  | 0.806 | 0.619 | 0.617 | 0.835 | 0.850 | 0.755 | 0.797 |
| mean                                     | 0.241 | 0.069 | 0.018 | 0.000 | 0.482 | 0.052 | 0.235 |
| standard deviation                       | 0.009 | 0.027 | 0.000 | 0.491 | 0.183 | 0.033 | 0.454 |
| coefficient of variation                 | 0.006 | 0.006 | 0.005 | 0.493 | 0.001 | 0.006 | 0.006 |
| skewness                                 | 0.000 | 0.000 | 0.000 | 0.000 | 0.000 | 0.000 | 0.000 |
| kurtosis                                 | 0.115 | 0.115 | 0.114 | 0.721 | 0.402 | 0.115 | 0.115 |
| variance                                 | 0.000 | 0.076 | 0.000 | 0.533 | 0.183 | 0.063 | 0.489 |
| median                                   | 0.016 | 0.292 | 0.353 | 0.509 | 0.453 | 0.267 | 0.193 |
| percentile 10th                          | 0.045 | 0.001 | 0.000 | 0.525 | 0.451 | 0.011 | 0.476 |
| percentile 90th                          | 0.000 | 0.000 | 0.049 | 0.301 | 0.137 | 0.000 | 0.164 |
| interquartile range                      | 0.000 | 0.281 | 0.264 | 0.466 | 0.222 | 0.234 | 0.516 |
| range                                    | 0.075 | 0.000 | 0.000 | 0.583 | 0.274 | 0.082 | 0.479 |
| mean absolut deviation                   | 0.000 | 0.071 | 0.012 | 0.478 | 0.204 | 0.045 | 0.471 |
| robust mean absolut deviation            | 0.000 | 0.112 | 0.095 | 0.406 | 0.165 | 0.034 | 0.433 |
| energy                                   | 0.000 | 0.364 | 0.096 | 0.859 | 0.688 | 0.581 | 0.638 |
| entropy                                  | 0.150 | 0.000 | 0.000 | 0.390 | 0.271 | 0.001 | 0.284 |
| root mean square                         | 0.010 | 0.037 | 0.000 | 0.503 | 0.157 | 0.046 | 0.453 |
| uniformity                               | 0.046 | 0.000 | 0.000 | 0.232 | 0.086 | 0.000 | 0.105 |
| energy                                   | 0.329 | 0.000 | 0.000 | 0.294 | 0.568 | 0.000 | 0.000 |
| entropy                                  | 0.653 | 0.000 | 0.000 | 0.657 | 0.761 | 0.074 | 0.234 |
| contrast                                 | 0.824 | 0.099 | 0.000 | 0.599 | 0.219 | 0.128 | 0.357 |
| correlation                              | 0.559 | 0.410 | 0.390 | 0.574 | 0.859 | 0.561 | 0.584 |
| homogeneity                              | 0.370 | 0.033 | 0.000 | 0.515 | 0.182 | 0.035 | 0.190 |
| homogeneity normalized                   | 0.811 | 0.727 | 0.743 | 0.809 | 0.660 | 0.831 | 0.534 |
| inverese difference                      | 0.428 | 0.004 | 0.000 | 0.522 | 0.190 | 0.016 | 0.169 |
| inverese difference normalized           | 0.692 | 0.569 | 0.575 | 0.824 | 0.650 | 0.684 | 0.434 |
| variance                                 | 0.826 | 0.112 | 0.000 | 0.614 | 0.232 | 0.154 | 0.379 |
| sum of average                           | 0.000 | 0.071 | 0.000 | 0.337 | 0.282 | 0.000 | 0.481 |
| sum of entropy                           | 0.529 | 0.000 | 0.000 | 0.522 | 0.759 | 0.045 | 0.269 |
| sum of variance                          | 0.820 | 0.127 | 0.000 | 0.635 | 0.262 | 0.183 | 0.415 |
| difference entropy                       | 0.367 | 0.000 | 0.000 | 0.497 | 0.674 | 0.019 | 0.204 |
| difference variance                      | 0.888 | 0.100 | 0.000 | 0.620 | 0.234 | 0.174 | 0.307 |
| information measures of correlation 1    | 0.882 | 0.844 | 0.879 | 0.882 | 0.824 | 0.847 | 0.866 |
| information measures of correlation 2    | 0.852 | 0.437 | 0.462 | 0.603 | 0.471 | 0.553 | 0.391 |
| maximal correlation coefficient          | 0.919 | 0.667 | 0.675 | 0.772 | 0.769 | 0.713 | 0.373 |
| joint maximum                            | 0.000 | 0.000 | 0.000 | 0.394 | 0.343 | 0.000 | 0.061 |
| joint average                            | 0.000 | 0.071 | 0.000 | 0.337 | 0.282 | 0.000 | 0.481 |
| difference average                       | 0.740 | 0.056 | 0.000 | 0.583 | 0.289 | 0.060 | 0.274 |
| dissimilarity                            | 0.740 | 0.056 | 0.000 | 0.583 | 0.289 | 0.060 | 0.274 |
| inverse variance                         | 0.543 | 0.451 | 0.455 | 0.626 | 0.417 | 0.381 | 0.088 |
| autocorrelation                          | 0.000 | 0.136 | 0.000 | 0.341 | 0.285 | 0.084 | 0.431 |
| cluster tendency                         | 0.820 | 0.127 | 0.000 | 0.635 | 0.262 | 0.183 | 0.415 |

|                                       |       |       |       |       |       |       |       |
|---------------------------------------|-------|-------|-------|-------|-------|-------|-------|
| cluster shade                         | 0.185 | 0.406 | 0.015 | 0.645 | 0.000 | 0.331 | 0.000 |
| cluster prominence                    | 0.804 | 0.205 | 0.000 | 0.815 | 0.090 | 0.331 | 0.284 |
| energy                                | 0.000 | 0.000 | 0.000 | 0.276 | 0.056 | 0.000 | 0.000 |
| entropy                               | 0.118 | 0.000 | 0.000 | 0.469 | 0.359 | 0.029 | 0.217 |
| contrast                              | 0.841 | 0.099 | 0.000 | 0.592 | 0.250 | 0.124 | 0.358 |
| correlation                           | 0.597 | 0.312 | 0.292 | 0.523 | 0.000 | 0.560 | 0.557 |
| homogeneity                           | 0.369 | 0.034 | 0.000 | 0.505 | 0.171 | 0.026 | 0.182 |
| homogeneity normalized                | 0.822 | 0.745 | 0.759 | 0.825 | 0.687 | 0.839 | 0.557 |
| inverse difference                    | 0.428 | 0.004 | 0.000 | 0.508 | 0.175 | 0.007 | 0.164 |
| inverse difference normalized         | 0.700 | 0.570 | 0.577 | 0.830 | 0.658 | 0.685 | 0.438 |
| variance                              | 0.823 | 0.113 | 0.000 | 0.618 | 0.224 | 0.155 | 0.380 |
| sum of average                        | 0.000 | 0.070 | 0.000 | 0.337 | 0.272 | 0.000 | 0.481 |
| sum of entropy                        | 0.553 | 0.000 | 0.000 | 0.511 | 0.291 | 0.001 | 0.231 |
| sum of variance                       | 0.800 | 0.129 | 0.000 | 0.647 | 0.194 | 0.189 | 0.413 |
| difference entropy                    | 0.674 | 0.000 | 0.000 | 0.540 | 0.353 | 0.009 | 0.179 |
| difference variance                   | 0.903 | 0.093 | 0.000 | 0.611 | 0.199 | 0.160 | 0.293 |
| information measures of correlation 1 | 0.874 | 0.538 | 0.491 | 0.487 | 0.163 | 0.705 | 0.171 |
| information measures of correlation 2 | 0.857 | 0.281 | 0.299 | 0.364 | 0.299 | 0.498 | 0.202 |
| maximal correlation coefficient       | 0.796 | 0.513 | 0.284 | 0.205 | 0.334 | 0.392 | 0.189 |
| joint maximum                         | 0.000 | 0.000 | 0.000 | 0.455 | 0.000 | 0.043 | 0.079 |
| joint average                         | 0.000 | 0.070 | 0.000 | 0.337 | 0.272 | 0.000 | 0.481 |
| difference average                    | 0.748 | 0.055 | 0.000 | 0.573 | 0.304 | 0.054 | 0.269 |
| dissimilarity                         | 0.748 | 0.055 | 0.000 | 0.573 | 0.304 | 0.054 | 0.269 |
| inverse variance                      | 0.526 | 0.450 | 0.452 | 0.634 | 0.348 | 0.394 | 0.093 |
| autocorrelation                       | 0.000 | 0.134 | 0.000 | 0.342 | 0.275 | 0.085 | 0.430 |
| cluster tendency                      | 0.800 | 0.129 | 0.000 | 0.647 | 0.194 | 0.189 | 0.413 |
| cluster shade                         | 0.179 | 0.415 | 0.040 | 0.617 | 0.000 | 0.340 | 0.000 |
| cluster prominence                    | 0.768 | 0.199 | 0.000 | 0.814 | 0.048 | 0.322 | 0.274 |
| coarseness                            | 0.921 | 0.667 | 0.664 | 0.614 | 0.700 | 0.866 | 0.799 |
| contrast                              | 0.846 | 0.196 | 0.260 | 0.457 | 0.504 | 0.259 | 0.380 |
| busyness                              | 0.740 | 0.086 | 0.165 | 0.005 | 0.000 | 0.281 | 0.000 |
| complexity                            | 0.383 | 0.197 | 0.000 | 0.725 | 0.255 | 0.279 | 0.437 |
| strength                              | 0.899 | 0.188 | 0.155 | 0.621 | 0.440 | 0.171 | 0.407 |
| grey level non-uniformity             | 0.843 | 0.883 | 0.885 | 0.895 | 0.769 | 0.885 | 0.933 |
| grey level non-uniformity normalized  | 0.083 | 0.000 | 0.000 | 0.246 | 0.125 | 0.000 | 0.168 |
| zone size non-uniformity              | 0.953 | 0.802 | 0.829 | 0.995 | 0.962 | 0.925 | 0.941 |
| zone size non-uniformity normalized   | 0.312 | 0.072 | 0.058 | 0.520 | 0.054 | 0.154 | 0.360 |
| short runs emphasis                   | 0.253 | 0.000 | 0.000 | 0.475 | 0.030 | 0.056 | 0.193 |
| long runs emphasis                    | 0.155 | 0.000 | 0.000 | 0.356 | 0.044 | 0.000 | 0.041 |
| low grey level run emphasis           | 0.593 | 0.141 | 0.183 | 0.420 | 0.287 | 0.000 | 0.163 |
| high grey level run emphasis          | 0.000 | 0.123 | 0.000 | 0.358 | 0.254 | 0.069 | 0.436 |
| short run low grey level emphasis     | 0.609 | 0.250 | 0.268 | 0.442 | 0.306 | 0.000 | 0.332 |
| short run high grey level emphasis    | 0.000 | 0.117 | 0.000 | 0.373 | 0.242 | 0.053 | 0.431 |
| long run low grey level emphasis      | 0.512 | 0.000 | 0.000 | 0.294 | 0.212 | 0.000 | 0.000 |
| long run high grey level emphasis     | 0.000 | 0.223 | 0.001 | 0.318 | 0.309 | 0.195 | 0.466 |
| run percentage                        | 0.250 | 0.044 | 0.024 | 0.461 | 0.064 | 0.103 | 0.243 |

|                                         |       |       |       |       |       |       |       |
|-----------------------------------------|-------|-------|-------|-------|-------|-------|-------|
| grey level variance                     | 0.805 | 0.057 | 0.000 | 0.535 | 0.186 | 0.104 | 0.494 |
| run length variance                     | 0.136 | 0.000 | 0.000 | 0.343 | 0.081 | 0.000 | 0.081 |
| run entropy                             | 0.246 | 0.266 | 0.242 | 0.549 | 0.550 | 0.398 | 0.718 |
| grey level non-uniformity               | 0.843 | 0.883 | 0.886 | 0.896 | 0.769 | 0.886 | 0.933 |
| grey level non-uniformity normalized    | 0.083 | 0.000 | 0.000 | 0.244 | 0.121 | 0.000 | 0.163 |
| zone size non-uniformity                | 0.953 | 0.798 | 0.826 | 0.995 | 0.962 | 0.924 | 0.939 |
| zone size non-uniformity normalized     | 0.311 | 0.057 | 0.043 | 0.525 | 0.053 | 0.147 | 0.340 |
| short runs emphasis                     | 0.267 | 0.000 | 0.000 | 0.484 | 0.040 | 0.074 | 0.207 |
| long runs emphasis                      | 0.165 | 0.000 | 0.000 | 0.366 | 0.061 | 0.000 | 0.058 |
| low grey level run emphasis             | 0.589 | 0.144 | 0.185 | 0.413 | 0.286 | 0.000 | 0.161 |
| high grey level run emphasis            | 0.000 | 0.123 | 0.000 | 0.358 | 0.253 | 0.069 | 0.436 |
| short run low grey level emphasis       | 0.598 | 0.249 | 0.267 | 0.438 | 0.302 | 0.000 | 0.323 |
| short run high grey level emphasis      | 0.000 | 0.117 | 0.000 | 0.373 | 0.242 | 0.054 | 0.431 |
| long run low grey level emphasis        | 0.527 | 0.000 | 0.000 | 0.292 | 0.215 | 0.000 | 0.000 |
| long run high grey level emphasis       | 0.000 | 0.215 | 0.000 | 0.319 | 0.309 | 0.191 | 0.466 |
| run percentage                          | 0.248 | 0.042 | 0.020 | 0.459 | 0.071 | 0.104 | 0.242 |
| grey level variance                     | 0.805 | 0.057 | 0.000 | 0.535 | 0.186 | 0.104 | 0.492 |
| run length variance                     | 0.138 | 0.000 | 0.000 | 0.345 | 0.085 | 0.000 | 0.084 |
| run entropy                             | 0.262 | 0.276 | 0.253 | 0.525 | 0.523 | 0.403 | 0.745 |
| grey level non-uniformity               | 0.932 | 0.884 | 0.874 | 0.969 | 0.894 | 0.930 | 0.802 |
| grey level non-uniformity normalized    | 0.106 | 0.199 | 0.314 | 0.600 | 0.481 | 0.118 | 0.040 |
| zone size non-uniformity                | 0.716 | 0.662 | 0.127 | 0.900 | 0.733 | 0.562 | 0.629 |
| zone size non-uniformity normalized     | 0.384 | 0.339 | 0.000 | 0.310 | 0.000 | 0.000 | 0.015 |
| small zone emphasis                     | 0.311 | 0.660 | 0.430 | 0.357 | 0.000 | 0.000 | 0.257 |
| large zone emphasis                     | 0.019 | 0.499 | 0.501 | 0.576 | 0.058 | 0.526 | 0.531 |
| low grey level zone emphasis            | 0.276 | 0.111 | 0.080 | 0.429 | 0.338 | 0.000 | 0.516 |
| high grey level zone emphasis           | 0.000 | 0.049 | 0.000 | 0.391 | 0.295 | 0.035 | 0.440 |
| small zone low grey level emphasis      | 0.263 | 0.066 | 0.033 | 0.510 | 0.000 | 0.277 | 0.396 |
| small zone high grey level emphasis     | 0.000 | 0.215 | 0.000 | 0.506 | 0.137 | 0.000 | 0.362 |
| large zone low grey level emphasis      | 0.000 | 0.000 | 0.000 | 0.000 | 0.000 | 0.000 | 0.000 |
| large zone high grey level emphasis     | 0.242 | 0.502 | 0.501 | 0.356 | 0.139 | 0.960 | 0.959 |
| zone percentage                         | 0.559 | 0.312 | 0.175 | 0.608 | 0.390 | 0.226 | 0.434 |
| grey level variance                     | 0.767 | 0.099 | 0.000 | 0.606 | 0.257 | 0.110 | 0.425 |
| zone size variance                      | 0.000 | 0.524 | 0.526 | 0.618 | 0.056 | 0.559 | 0.564 |
| zone size entropy                       | 0.743 | 0.082 | 0.158 | 0.694 | 0.859 | 0.462 | 0.350 |
| grey level non-uniformity               | 0.932 | 0.884 | 0.874 | 0.969 | 0.894 | 0.930 | 0.802 |
| grey level non-uniformity normalized    | 0.085 | 0.200 | 0.314 | 0.604 | 0.482 | 0.119 | 0.041 |
| zone size non-uniformity                | 0.766 | 0.397 | 0.380 | 0.922 | 0.916 | 0.669 | 0.812 |
| zone size non-uniformity normalized     | 0.871 | 0.670 | 0.686 | 0.941 | 0.556 | 0.839 | 0.516 |
| small distance emphasis                 | 0.855 | 0.660 | 0.685 | 0.942 | 0.552 | 0.788 | 0.412 |
| large distance emphasis                 | 0.856 | 0.616 | 0.637 | 0.940 | 0.668 | 0.896 | 0.320 |
| low grey level zone emphasis            | 0.269 | 0.111 | 0.082 | 0.425 | 0.333 | 0.000 | 0.515 |
| high grey level zone emphasis           | 0.000 | 0.049 | 0.000 | 0.391 | 0.295 | 0.035 | 0.440 |
| small distance low grey level emphasis  | 0.331 | 0.045 | 0.000 | 0.527 | 0.386 | 0.000 | 0.552 |
| small distance high grey level emphasis | 0.000 | 0.000 | 0.000 | 0.284 | 0.259 | 0.000 | 0.525 |
| large distance low grey level emphasis  | 0.051 | 0.231 | 0.210 | 0.000 | 0.118 | 0.038 | 0.350 |

|                                            |       |       |       |       |       |       |       |
|--------------------------------------------|-------|-------|-------|-------|-------|-------|-------|
| large distance high grey level emphasis    | 0.000 | 0.262 | 0.000 | 0.565 | 0.477 | 0.271 | 0.132 |
| zone percentage                            | 0.558 | 0.313 | 0.176 | 0.609 | 0.390 | 0.224 | 0.434 |
| grey level variance                        | 0.767 | 0.099 | 0.000 | 0.606 | 0.257 | 0.110 | 0.425 |
| zone distance variance                     | 0.808 | 0.551 | 0.558 | 0.881 | 0.752 | 0.855 | 0.330 |
| zone distance entropy                      | 0.522 | 0.227 | 0.036 | 0.801 | 0.522 | 0.407 | 0.344 |
| grey level non-uniformity                  | 0.761 | 0.694 | 0.701 | 0.843 | 0.716 | 0.738 | 0.777 |
| grey level non-uniformity normalized       | 0.044 | 0.000 | 0.000 | 0.234 | 0.089 | 0.000 | 0.105 |
| dependence count non-uniformity            | 0.720 | 0.647 | 0.753 | 0.927 | 0.887 | 0.808 | 0.950 |
| dependence count non-uniformity normalized | 0.658 | 0.558 | 0.639 | 0.631 | 0.342 | 0.769 | 0.716 |
| low dependence emphasis                    | 0.582 | 0.177 | 0.000 | 0.496 | 0.155 | 0.000 | 0.362 |
| high dependence emphasis                   | 0.067 | 0.000 | 0.000 | 0.432 | 0.009 | 0.013 | 0.145 |
| low grey level count emphasis              | 0.609 | 0.164 | 0.205 | 0.420 | 0.274 | 0.000 | 0.145 |
| high grey level count emphasis             | 0.000 | 0.126 | 0.000 | 0.357 | 0.257 | 0.064 | 0.436 |
| low dependence low grey level emphasis     | 0.568 | 0.295 | 0.264 | 0.694 | 0.686 | 0.628 | 0.562 |
| low dependence high grey level emphasis    | 0.161 | 0.250 | 0.000 | 0.583 | 0.020 | 0.000 | 0.318 |
| high dependence low grey level emphasis    | 0.000 | 0.000 | 0.000 | 0.000 | 0.000 | 0.000 | 0.000 |
| high dependence high grey level emphasis   | 0.235 | 0.230 | 0.197 | 0.392 | 0.154 | 0.459 | 0.493 |
| grey level variance                        | 0.804 | 0.053 | 0.000 | 0.532 | 0.182 | 0.087 | 0.472 |
| dependence count variance                  | 0.043 | 0.131 | 0.114 | 0.601 | 0.023 | 0.112 | 0.310 |
| dependence count entropy                   | 0.890 | 0.811 | 0.821 | 0.897 | 0.963 | 0.807 | 0.875 |
| dependence count energy                    | 0.875 | 0.720 | 0.730 | 0.837 | 0.935 | 0.755 | 0.887 |
| mean                                       | 0.011 | 0.500 | 0.552 | 0.480 | 0.346 | 0.467 | 0.580 |
| standard deviation                         | 0.000 | 0.478 | 0.686 | 0.774 | 0.261 | 0.721 | 0.430 |
| coefficient of variation                   | 0.000 | 0.000 | 0.000 | 0.006 | 0.000 | 0.000 | 0.000 |
| skewness                                   | 0.083 | 0.083 | 0.083 | 0.004 | 0.629 | 0.083 | 0.083 |
| kurtosis                                   | 0.472 | 0.472 | 0.474 | 0.705 | 0.336 | 0.472 | 0.472 |
| variance                                   | 0.000 | 0.416 | 0.688 | 0.746 | 0.231 | 0.686 | 0.396 |
| median                                     | 0.089 | 0.574 | 0.579 | 0.423 | 0.189 | 0.495 | 0.330 |
| percentile 10th                            | 0.000 | 0.356 | 0.708 | 0.698 | 0.197 | 0.733 | 0.587 |
| percentile 90th                            | 0.000 | 0.548 | 0.711 | 0.706 | 0.513 | 0.579 | 0.238 |
| interquartile range                        | 0.000 | 0.419 | 0.519 | 0.808 | 0.384 | 0.624 | 0.807 |
| range                                      | 0.000 | 0.257 | 0.325 | 0.603 | 0.017 | 0.488 | 0.302 |
| mean absolut deviation                     | 0.000 | 0.508 | 0.707 | 0.808 | 0.413 | 0.741 | 0.614 |
| robust mean absolut deviation              | 0.000 | 0.489 | 0.668 | 0.823 | 0.407 | 0.683 | 0.738 |
| energy                                     | 0.000 | 0.390 | 0.480 | 0.774 | 0.848 | 0.772 | 0.742 |
| entropy                                    | 0.502 | 0.538 | 0.654 | 0.731 | 0.394 | 0.741 | 0.518 |
| root mean square                           | 0.000 | 0.492 | 0.694 | 0.778 | 0.364 | 0.732 | 0.465 |
| uniformity                                 | 0.564 | 0.542 | 0.591 | 0.773 | 0.175 | 0.752 | 0.659 |
| energy                                     | 0.590 | 0.381 | 0.394 | 0.668 | 0.724 | 0.567 | 0.669 |
| entropy                                    | 0.867 | 0.540 | 0.599 | 0.854 | 0.866 | 0.738 | 0.630 |
| contrast                                   | 0.486 | 0.458 | 0.719 | 0.745 | 0.219 | 0.708 | 0.346 |
| correlation                                | 0.000 | 0.000 | 0.000 | 0.000 | 0.422 | 0.000 | 0.000 |
| homogeneity                                | 0.764 | 0.640 | 0.746 | 0.895 | 0.341 | 0.786 | 0.737 |
| homogeneity normalized                     | 0.531 | 0.545 | 0.552 | 0.692 | 0.767 | 0.480 | 0.613 |

|                                       |       |       |       |       |       |       |       |
|---------------------------------------|-------|-------|-------|-------|-------|-------|-------|
| inverse difference                    | 0.761 | 0.628 | 0.743 | 0.889 | 0.364 | 0.777 | 0.739 |
| inverse difference normalized         | 0.653 | 0.665 | 0.677 | 0.771 | 0.731 | 0.593 | 0.745 |
| variance                              | 0.627 | 0.472 | 0.750 | 0.746 | 0.207 | 0.729 | 0.408 |
| sum of average                        | 0.041 | 0.051 | 0.369 | 0.531 | 0.343 | 0.371 | 0.021 |
| sum of entropy                        | 0.697 | 0.437 | 0.531 | 0.777 | 0.836 | 0.630 | 0.551 |
| sum of variance                       | 0.743 | 0.483 | 0.775 | 0.727 | 0.196 | 0.734 | 0.443 |
| difference entropy                    | 0.583 | 0.421 | 0.553 | 0.698 | 0.810 | 0.647 | 0.518 |
| difference variance                   | 0.437 | 0.400 | 0.639 | 0.785 | 0.067 | 0.691 | 0.186 |
| information measures of correlation 1 | 0.929 | 0.806 | 0.868 | 0.883 | 0.778 | 0.898 | 0.784 |
| information measures of correlation 2 | 0.799 | 0.751 | 0.797 | 0.608 | 0.709 | 0.856 | 0.826 |
| maximal correlation coefficient       | 0.904 | 0.832 | 0.872 | 0.710 | 0.751 | 0.882 | 0.816 |
| joint maximum                         | 0.573 | 0.506 | 0.526 | 0.861 | 0.725 | 0.597 | 0.836 |
| joint average                         | 0.041 | 0.051 | 0.369 | 0.531 | 0.343 | 0.371 | 0.021 |
| difference average                    | 0.611 | 0.529 | 0.742 | 0.800 | 0.374 | 0.745 | 0.553 |
| dissimilarity                         | 0.611 | 0.529 | 0.742 | 0.800 | 0.374 | 0.745 | 0.553 |
| inverse variance                      | 0.681 | 0.593 | 0.772 | 0.879 | 0.477 | 0.751 | 0.226 |
| autocorrelation                       | 0.000 | 0.000 | 0.327 | 0.552 | 0.223 | 0.337 | 0.000 |
| cluster tendency                      | 0.743 | 0.483 | 0.775 | 0.727 | 0.196 | 0.734 | 0.443 |
| cluster shade                         | 0.191 | 0.769 | 0.738 | 0.513 | 0.670 | 0.669 | 0.328 |
| cluster prominence                    | 0.687 | 0.412 | 0.757 | 0.607 | 0.000 | 0.698 | 0.133 |
| energy                                | 0.708 | 0.439 | 0.440 | 0.749 | 0.224 | 0.636 | 0.752 |
| entropy                               | 0.600 | 0.552 | 0.664 | 0.768 | 0.580 | 0.739 | 0.571 |
| contrast                              | 0.499 | 0.452 | 0.715 | 0.747 | 0.262 | 0.703 | 0.343 |
| correlation                           | 0.000 | 0.000 | 0.000 | 0.000 | 0.279 | 0.000 | 0.000 |
| homogeneity                           | 0.767 | 0.636 | 0.738 | 0.892 | 0.382 | 0.781 | 0.734 |
| homogeneity normalized                | 0.539 | 0.548 | 0.557 | 0.688 | 0.790 | 0.474 | 0.611 |
| inverse difference                    | 0.759 | 0.623 | 0.734 | 0.887 | 0.413 | 0.773 | 0.736 |
| inverse difference normalized         | 0.646 | 0.661 | 0.673 | 0.760 | 0.758 | 0.592 | 0.741 |
| variance                              | 0.637 | 0.474 | 0.752 | 0.753 | 0.267 | 0.732 | 0.417 |
| sum of average                        | 0.039 | 0.051 | 0.370 | 0.531 | 0.336 | 0.370 | 0.019 |
| sum of entropy                        | 0.715 | 0.557 | 0.690 | 0.803 | 0.303 | 0.746 | 0.570 |
| sum of variance                       | 0.747 | 0.494 | 0.784 | 0.742 | 0.278 | 0.745 | 0.471 |
| difference entropy                    | 0.626 | 0.518 | 0.661 | 0.809 | 0.356 | 0.731 | 0.412 |
| difference variance                   | 0.445 | 0.404 | 0.647 | 0.779 | 0.022 | 0.701 | 0.160 |
| information measures of correlation 1 | 0.777 | 0.574 | 0.743 | 0.602 | 0.294 | 0.578 | 0.000 |
| information measures of correlation 2 | 0.677 | 0.549 | 0.723 | 0.490 | 0.356 | 0.638 | 0.018 |
| maximal correlation coefficient       | 0.085 | 0.326 | 0.463 | 0.000 | 0.380 | 0.135 | 0.071 |
| joint maximum                         | 0.646 | 0.525 | 0.552 | 0.915 | 0.007 | 0.616 | 0.863 |
| joint average                         | 0.039 | 0.051 | 0.370 | 0.531 | 0.336 | 0.370 | 0.019 |
| difference average                    | 0.610 | 0.525 | 0.738 | 0.803 | 0.415 | 0.741 | 0.549 |
| dissimilarity                         | 0.610 | 0.525 | 0.738 | 0.803 | 0.415 | 0.741 | 0.549 |
| inverse variance                      | 0.681 | 0.592 | 0.769 | 0.878 | 0.511 | 0.755 | 0.203 |
| autocorrelation                       | 0.000 | 0.000 | 0.330 | 0.551 | 0.222 | 0.336 | 0.000 |
| cluster tendency                      | 0.747 | 0.494 | 0.784 | 0.742 | 0.278 | 0.745 | 0.471 |
| cluster shade                         | 0.136 | 0.776 | 0.739 | 0.464 | 0.698 | 0.642 | 0.281 |
| cluster prominence                    | 0.674 | 0.437 | 0.775 | 0.630 | 0.016 | 0.724 | 0.142 |

|                                      |       |       |       |       |       |       |       |
|--------------------------------------|-------|-------|-------|-------|-------|-------|-------|
| coarseness                           | 0.879 | 0.836 | 0.838 | 0.961 | 0.823 | 0.964 | 0.930 |
| contrast                             | 0.347 | 0.726 | 0.855 | 0.619 | 0.896 | 0.817 | 0.598 |
| busyness                             | 0.552 | 0.406 | 0.413 | 0.116 | 0.527 | 0.460 | 0.330 |
| complexity                           | 0.160 | 0.323 | 0.446 | 0.623 | 0.099 | 0.646 | 0.324 |
| strength                             | 0.908 | 0.615 | 0.703 | 0.806 | 0.348 | 0.693 | 0.387 |
| grey level non-uniformity            | 0.877 | 0.911 | 0.920 | 0.916 | 0.824 | 0.966 | 0.933 |
| grey level non-uniformity normalized | 0.535 | 0.534 | 0.592 | 0.758 | 0.220 | 0.757 | 0.475 |
| zone size non-uniformity             | 0.976 | 0.937 | 0.951 | 0.984 | 0.973 | 0.979 | 0.977 |
| zone size non-uniformity normalized  | 0.838 | 0.645 | 0.707 | 0.863 | 0.430 | 0.732 | 0.810 |
| short runs emphasis                  | 0.835 | 0.597 | 0.640 | 0.841 | 0.414 | 0.687 | 0.792 |
| long runs emphasis                   | 0.843 | 0.593 | 0.609 | 0.833 | 0.439 | 0.622 | 0.896 |
| low grey level run emphasis          | 0.477 | 0.461 | 0.497 | 0.348 | 0.629 | 0.081 | 0.191 |
| high grey level run emphasis         | 0.074 | 0.000 | 0.337 | 0.576 | 0.187 | 0.387 | 0.000 |
| short run low grey level emphasis    | 0.486 | 0.472 | 0.518 | 0.384 | 0.640 | 0.091 | 0.214 |
| short run high grey level emphasis   | 0.114 | 0.012 | 0.353 | 0.579 | 0.177 | 0.408 | 0.000 |
| long run low grey level emphasis     | 0.443 | 0.422 | 0.456 | 0.231 | 0.592 | 0.047 | 0.092 |
| long run high grey level emphasis    | 0.002 | 0.000 | 0.318 | 0.582 | 0.240 | 0.345 | 0.102 |
| run percentage                       | 0.844 | 0.656 | 0.703 | 0.862 | 0.435 | 0.711 | 0.865 |
| grey level variance                  | 0.597 | 0.400 | 0.663 | 0.729 | 0.209 | 0.686 | 0.295 |
| run length variance                  | 0.839 | 0.642 | 0.654 | 0.848 | 0.463 | 0.627 | 0.918 |
| run entropy                          | 0.458 | 0.468 | 0.598 | 0.638 | 0.711 | 0.674 | 0.662 |
| grey level non-uniformity            | 0.877 | 0.912 | 0.920 | 0.916 | 0.824 | 0.966 | 0.933 |
| grey level non-uniformity normalized | 0.523 | 0.535 | 0.594 | 0.758 | 0.214 | 0.757 | 0.477 |
| zone size non-uniformity             | 0.976 | 0.936 | 0.951 | 0.984 | 0.973 | 0.979 | 0.977 |
| zone size non-uniformity normalized  | 0.838 | 0.643 | 0.706 | 0.863 | 0.422 | 0.731 | 0.802 |
| short runs emphasis                  | 0.840 | 0.609 | 0.654 | 0.846 | 0.416 | 0.697 | 0.807 |
| long runs emphasis                   | 0.842 | 0.616 | 0.635 | 0.837 | 0.435 | 0.638 | 0.898 |
| low grey level run emphasis          | 0.486 | 0.458 | 0.499 | 0.351 | 0.631 | 0.078 | 0.190 |
| high grey level run emphasis         | 0.074 | 0.000 | 0.337 | 0.576 | 0.188 | 0.387 | 0.000 |
| short run low grey level emphasis    | 0.493 | 0.474 | 0.516 | 0.377 | 0.638 | 0.089 | 0.220 |
| short run high grey level emphasis   | 0.114 | 0.012 | 0.354 | 0.579 | 0.176 | 0.408 | 0.000 |
| long run low grey level emphasis     | 0.452 | 0.426 | 0.462 | 0.239 | 0.596 | 0.050 | 0.087 |
| long run high grey level emphasis    | 0.003 | 0.000 | 0.312 | 0.582 | 0.240 | 0.345 | 0.104 |
| run percentage                       | 0.840 | 0.654 | 0.701 | 0.864 | 0.438 | 0.714 | 0.865 |
| grey level variance                  | 0.598 | 0.400 | 0.663 | 0.728 | 0.210 | 0.686 | 0.298 |
| run length variance                  | 0.836 | 0.654 | 0.669 | 0.848 | 0.458 | 0.632 | 0.916 |
| run entropy                          | 0.439 | 0.478 | 0.613 | 0.638 | 0.753 | 0.693 | 0.597 |
| grey level non-uniformity            | 0.953 | 0.841 | 0.882 | 0.880 | 0.973 | 0.958 | 0.929 |
| grey level non-uniformity normalized | 0.277 | 0.485 | 0.480 | 0.528 | 0.497 | 0.636 | 0.288 |
| zone size non-uniformity             | 0.913 | 0.369 | 0.472 | 0.791 | 0.907 | 0.597 | 0.401 |
| zone size non-uniformity normalized  | 0.407 | 0.302 | 0.291 | 0.335 | 0.000 | 0.000 | 0.247 |
| small zone emphasis                  | 0.368 | 0.314 | 0.319 | 0.310 | 0.000 | 0.000 | 0.405 |
| large zone emphasis                  | 0.786 | 0.677 | 0.676 | 0.609 | 0.290 | 0.916 | 0.813 |
| low grey level zone emphasis         | 0.433 | 0.461 | 0.529 | 0.298 | 0.600 | 0.185 | 0.000 |
| high grey level zone emphasis        | 0.010 | 0.142 | 0.358 | 0.577 | 0.211 | 0.350 | 0.027 |
| small zone low grey level emphasis   | 0.481 | 0.377 | 0.461 | 0.425 | 0.701 | 0.411 | 0.050 |



|                                            |       |       |       |       |       |       |       |
|--------------------------------------------|-------|-------|-------|-------|-------|-------|-------|
| small zone high grey level emphasis        | 0.213 | 0.221 | 0.386 | 0.564 | 0.130 | 0.341 | 0.145 |
| large zone low grey level emphasis         | 0.353 | 0.374 | 0.374 | 0.067 | 0.000 | 0.213 | 0.343 |
| large zone high grey level emphasis        | 0.865 | 0.603 | 0.596 | 0.766 | 0.857 | 0.780 | 0.793 |
| zone percentage                            | 0.830 | 0.628 | 0.806 | 0.766 | 0.384 | 0.773 | 0.561 |
| grey level variance                        | 0.346 | 0.304 | 0.437 | 0.638 | 0.103 | 0.494 | 0.535 |
| zone size variance                         | 0.784 | 0.700 | 0.699 | 0.612 | 0.281 | 0.925 | 0.835 |
| zone size entropy                          | 0.799 | 0.379 | 0.384 | 0.783 | 0.904 | 0.677 | 0.522 |
| grey level non-uniformity                  | 0.953 | 0.841 | 0.882 | 0.880 | 0.972 | 0.958 | 0.929 |
| grey level non-uniformity normalized       | 0.259 | 0.486 | 0.481 | 0.524 | 0.492 | 0.641 | 0.293 |
| zone size non-uniformity                   | 0.922 | 0.232 | 0.232 | 0.898 | 0.982 | 0.730 | 0.505 |
| zone size non-uniformity normalized        | 0.752 | 0.469 | 0.434 | 0.788 | 0.587 | 0.632 | 0.794 |
| small distance emphasis                    | 0.668 | 0.356 | 0.328 | 0.768 | 0.604 | 0.553 | 0.770 |
| large distance emphasis                    | 0.605 | 0.338 | 0.311 | 0.731 | 0.575 | 0.506 | 0.658 |
| low grey level zone emphasis               | 0.442 | 0.462 | 0.530 | 0.298 | 0.600 | 0.183 | 0.000 |
| high grey level zone emphasis              | 0.010 | 0.141 | 0.358 | 0.577 | 0.211 | 0.350 | 0.027 |
| small distance low grey level emphasis     | 0.572 | 0.444 | 0.538 | 0.557 | 0.601 | 0.283 | 0.108 |
| small distance high grey level emphasis    | 0.000 | 0.017 | 0.115 | 0.550 | 0.184 | 0.288 | 0.008 |
| large distance low grey level emphasis     | 0.642 | 0.414 | 0.402 | 0.207 | 0.590 | 0.146 | 0.000 |
| large distance high grey level emphasis    | 0.362 | 0.364 | 0.709 | 0.626 | 0.243 | 0.559 | 0.550 |
| zone percentage                            | 0.831 | 0.628 | 0.807 | 0.766 | 0.385 | 0.774 | 0.561 |
| grey level variance                        | 0.346 | 0.304 | 0.437 | 0.638 | 0.103 | 0.494 | 0.534 |
| zone distance variance                     | 0.573 | 0.368 | 0.342 | 0.685 | 0.538 | 0.495 | 0.590 |
| zone distance entropy                      | 0.677 | 0.521 | 0.561 | 0.674 | 0.737 | 0.622 | 0.584 |
| grey level non-uniformity                  | 0.860 | 0.893 | 0.899 | 0.900 | 0.783 | 0.938 | 0.944 |
| grey level non-uniformity normalized       | 0.566 | 0.543 | 0.592 | 0.772 | 0.169 | 0.749 | 0.659 |
| dependence count non-uniformity            | 0.925 | 0.746 | 0.908 | 0.953 | 0.923 | 0.911 | 0.928 |
| dependence count non-uniformity normalized | 0.849 | 0.681 | 0.789 | 0.795 | 0.410 | 0.842 | 0.826 |
| low dependence emphasis                    | 0.805 | 0.604 | 0.779 | 0.738 | 0.296 | 0.702 | 0.424 |
| high dependence emphasis                   | 0.852 | 0.636 | 0.639 | 0.876 | 0.386 | 0.581 | 0.921 |
| low grey level count emphasis              | 0.486 | 0.450 | 0.488 | 0.353 | 0.632 | 0.077 | 0.207 |
| high grey level count emphasis             | 0.077 | 0.000 | 0.336 | 0.575 | 0.187 | 0.390 | 0.000 |
| low dependence low grey level emphasis     | 0.631 | 0.490 | 0.498 | 0.648 | 0.772 | 0.579 | 0.066 |
| low dependence high grey level emphasis    | 0.651 | 0.187 | 0.502 | 0.595 | 0.056 | 0.516 | 0.000 |
| high dependence low grey level emphasis    | 0.182 | 0.431 | 0.455 | 0.111 | 0.048 | 0.031 | 0.057 |
| high dependence high grey level emphasis   | 0.626 | 0.608 | 0.636 | 0.887 | 0.575 | 0.668 | 0.381 |
| grey level variance                        | 0.609 | 0.412 | 0.682 | 0.739 | 0.222 | 0.701 | 0.396 |
| dependence count variance                  | 0.831 | 0.802 | 0.821 | 0.969 | 0.406 | 0.544 | 0.850 |
| dependence count entropy                   | 0.868 | 0.757 | 0.756 | 0.831 | 0.921 | 0.772 | 0.837 |
| dependence count energy                    | 0.669 | 0.543 | 0.549 | 0.712 | 0.902 | 0.550 | 0.704 |
| mean                                       | 0.168 | 0.374 | 0.464 | 0.181 | 0.066 | 0.328 | 0.048 |
| standard deviation                         | 0.025 | 0.258 | 0.124 | 0.567 | 0.431 | 0.301 | 0.506 |
| coefficient of variation                   | 0.000 | 0.000 | 0.263 | 0.132 | 0.230 | 0.000 | 0.000 |
| skewness                                   | 0.059 | 0.059 | 0.057 | 0.247 | 0.110 | 0.059 | 0.059 |
| kurtosis                                   | 0.000 | 0.000 | 0.000 | 0.538 | 0.208 | 0.000 | 0.000 |

|                                       |       |       |       |       |       |       |       |
|---------------------------------------|-------|-------|-------|-------|-------|-------|-------|
| variance                              | 0.002 | 0.295 | 0.068 | 0.609 | 0.515 | 0.323 | 0.629 |
| median                                | 0.023 | 0.035 | 0.216 | 0.000 | 0.773 | 0.157 | 0.071 |
| percentile 10th                       | 0.071 | 0.176 | 0.000 | 0.393 | 0.466 | 0.258 | 0.000 |
| percentile 90th                       | 0.025 | 0.265 | 0.256 | 0.565 | 0.311 | 0.243 | 0.633 |
| interquartile range                   | 0.086 | 0.323 | 0.261 | 0.641 | 0.777 | 0.311 | 0.667 |
| range                                 | 0.010 | 0.218 | 0.000 | 0.689 | 0.230 | 0.284 | 0.186 |
| mean absolut deviation                | 0.041 | 0.219 | 0.112 | 0.524 | 0.516 | 0.230 | 0.541 |
| robust mean absolut deviation         | 0.071 | 0.176 | 0.102 | 0.417 | 0.625 | 0.116 | 0.539 |
| energy                                | 0.000 | 0.562 | 0.200 | 0.902 | 0.895 | 0.725 | 0.732 |
| entropy                               | 0.050 | 0.134 | 0.001 | 0.414 | 0.639 | 0.224 | 0.441 |
| root mean square                      | 0.026 | 0.255 | 0.137 | 0.553 | 0.351 | 0.292 | 0.469 |
| uniformity                            | 0.086 | 0.027 | 0.000 | 0.327 | 0.550 | 0.008 | 0.305 |
| energy                                | 0.631 | 0.000 | 0.000 | 0.527 | 0.749 | 0.096 | 0.141 |
| entropy                               | 0.774 | 0.290 | 0.205 | 0.855 | 0.871 | 0.530 | 0.443 |
| contrast                              | 0.388 | 0.266 | 0.142 | 0.512 | 0.573 | 0.269 | 0.368 |
| correlation                           | 0.184 | 0.224 | 0.210 | 0.314 | 0.512 | 0.253 | 0.220 |
| homogeneity                           | 0.263 | 0.276 | 0.283 | 0.657 | 0.797 | 0.342 | 0.378 |
| homogeneity normalized                | 0.348 | 0.349 | 0.353 | 0.841 | 0.445 | 0.325 | 0.387 |
| inverese difference                   | 0.285 | 0.243 | 0.238 | 0.663 | 0.780 | 0.303 | 0.375 |
| inverese difference normalized        | 0.321 | 0.359 | 0.365 | 0.848 | 0.439 | 0.353 | 0.353 |
| variance                              | 0.334 | 0.285 | 0.134 | 0.546 | 0.496 | 0.298 | 0.419 |
| sum of average                        | 0.000 | 0.444 | 0.020 | 0.582 | 0.436 | 0.087 | 0.000 |
| sum of entropy                        | 0.553 | 0.216 | 0.089 | 0.676 | 0.842 | 0.404 | 0.334 |
| sum of variance                       | 0.272 | 0.307 | 0.125 | 0.582 | 0.369 | 0.334 | 0.463 |
| difference entropy                    | 0.163 | 0.265 | 0.195 | 0.536 | 0.785 | 0.436 | 0.200 |
| difference variance                   | 0.439 | 0.320 | 0.082 | 0.558 | 0.438 | 0.348 | 0.245 |
| information measures of correlation 1 | 0.837 | 0.840 | 0.923 | 0.892 | 0.926 | 0.922 | 0.853 |
| information measures of correlation 2 | 0.697 | 0.712 | 0.782 | 0.690 | 0.831 | 0.809 | 0.869 |
| maximal correlation coefficient       | 0.819 | 0.748 | 0.827 | 0.757 | 0.847 | 0.819 | 0.712 |
| joint maximum                         | 0.439 | 0.000 | 0.000 | 0.390 | 0.791 | 0.000 | 0.189 |
| joint average                         | 0.000 | 0.443 | 0.020 | 0.582 | 0.436 | 0.087 | 0.000 |
| difference average                    | 0.339 | 0.264 | 0.246 | 0.564 | 0.615 | 0.293 | 0.364 |
| dissimilarity                         | 0.339 | 0.264 | 0.246 | 0.564 | 0.615 | 0.293 | 0.364 |
| inverse variance                      | 0.229 | 0.589 | 0.710 | 0.691 | 0.550 | 0.666 | 0.078 |
| autocorrelation                       | 0.000 | 0.607 | 0.044 | 0.549 | 0.474 | 0.207 | 0.000 |
| cluster tendency                      | 0.272 | 0.307 | 0.125 | 0.582 | 0.369 | 0.334 | 0.463 |
| cluster shade                         | 0.099 | 0.103 | 0.073 | 0.365 | 0.000 | 0.242 | 0.000 |
| cluster prominence                    | 0.264 | 0.394 | 0.000 | 0.703 | 0.579 | 0.567 | 0.576 |
| energy                                | 0.000 | 0.037 | 0.007 | 0.439 | 0.652 | 0.032 | 0.100 |
| entropy                               | 0.000 | 0.180 | 0.077 | 0.500 | 0.734 | 0.299 | 0.348 |
| contrast                              | 0.375 | 0.263 | 0.141 | 0.523 | 0.494 | 0.271 | 0.376 |
| correlation                           | 0.400 | 0.446 | 0.441 | 0.385 | 0.380 | 0.457 | 0.512 |
| homogeneity                           | 0.237 | 0.270 | 0.277 | 0.649 | 0.703 | 0.323 | 0.351 |
| homogeneity normalized                | 0.335 | 0.331 | 0.336 | 0.814 | 0.483 | 0.316 | 0.360 |
| inverese difference                   | 0.258 | 0.238 | 0.235 | 0.654 | 0.672 | 0.283 | 0.336 |
| inverese difference normalized        | 0.300 | 0.343 | 0.350 | 0.829 | 0.479 | 0.331 | 0.331 |

|                                       |       |       |       |       |       |       |       |
|---------------------------------------|-------|-------|-------|-------|-------|-------|-------|
| variance                              | 0.320 | 0.283 | 0.128 | 0.547 | 0.508 | 0.297 | 0.429 |
| sum of average                        | 0.000 | 0.444 | 0.020 | 0.581 | 0.434 | 0.088 | 0.000 |
| sum of entropy                        | 0.000 | 0.222 | 0.151 | 0.555 | 0.566 | 0.324 | 0.266 |
| sum of variance                       | 0.256 | 0.306 | 0.116 | 0.572 | 0.508 | 0.325 | 0.475 |
| difference entropy                    | 0.194 | 0.308 | 0.313 | 0.568 | 0.462 | 0.375 | 0.180 |
| difference variance                   | 0.469 | 0.324 | 0.098 | 0.582 | 0.390 | 0.358 | 0.275 |
| information measures of correlation 1 | 0.254 | 0.525 | 0.502 | 0.359 | 0.724 | 0.597 | 0.000 |
| information measures of correlation 2 | 0.246 | 0.500 | 0.556 | 0.340 | 0.559 | 0.655 | 0.221 |
| maximal correlation coefficient       | 0.186 | 0.410 | 0.371 | 0.258 | 0.832 | 0.329 | 0.000 |
| joint maximum                         | 0.094 | 0.034 | 0.018 | 0.446 | 0.598 | 0.000 | 0.192 |
| joint average                         | 0.000 | 0.443 | 0.020 | 0.581 | 0.434 | 0.088 | 0.000 |
| difference average                    | 0.321 | 0.261 | 0.242 | 0.566 | 0.513 | 0.289 | 0.361 |
| dissimilarity                         | 0.321 | 0.261 | 0.242 | 0.566 | 0.513 | 0.289 | 0.361 |
| inverse variance                      | 0.225 | 0.601 | 0.713 | 0.694 | 0.501 | 0.682 | 0.186 |
| autocorrelation                       | 0.000 | 0.607 | 0.043 | 0.550 | 0.468 | 0.208 | 0.000 |
| cluster tendency                      | 0.256 | 0.306 | 0.116 | 0.572 | 0.508 | 0.325 | 0.475 |
| cluster shade                         | 0.204 | 0.077 | 0.078 | 0.330 | 0.000 | 0.172 | 0.000 |
| cluster prominence                    | 0.260 | 0.402 | 0.000 | 0.710 | 0.612 | 0.561 | 0.593 |
| coarseness                            | 0.930 | 0.935 | 0.936 | 0.707 | 0.846 | 0.681 | 0.615 |
| contrast                              | 0.572 | 0.608 | 0.789 | 0.745 | 0.529 | 0.335 | 0.292 |
| busyness                              | 0.484 | 0.148 | 0.140 | 0.199 | 0.000 | 0.112 | 0.000 |
| complexity                            | 0.000 | 0.489 | 0.000 | 0.798 | 0.684 | 0.621 | 0.579 |
| strength                              | 0.801 | 0.345 | 0.299 | 0.563 | 0.000 | 0.430 | 0.329 |
| grey level non-uniformity             | 0.770 | 0.894 | 0.898 | 0.952 | 0.948 | 0.930 | 0.927 |
| grey level non-uniformity normalized  | 0.120 | 0.081 | 0.015 | 0.326 | 0.552 | 0.086 | 0.347 |
| zone size non-uniformity              | 0.955 | 0.921 | 0.932 | 0.985 | 0.954 | 0.961 | 0.959 |
| zone size non-uniformity normalized   | 0.365 | 0.276 | 0.279 | 0.639 | 0.758 | 0.296 | 0.524 |
| short runs emphasis                   | 0.338 | 0.228 | 0.226 | 0.615 | 0.739 | 0.248 | 0.391 |
| long runs emphasis                    | 0.289 | 0.193 | 0.173 | 0.584 | 0.751 | 0.171 | 0.278 |
| low grey level run emphasis           | 0.595 | 0.000 | 0.000 | 0.514 | 0.349 | 0.055 | 0.002 |
| high grey level run emphasis          | 0.000 | 0.581 | 0.036 | 0.555 | 0.449 | 0.221 | 0.000 |
| short run low grey level emphasis     | 0.602 | 0.000 | 0.000 | 0.530 | 0.364 | 0.083 | 0.054 |
| short run high grey level emphasis    | 0.000 | 0.567 | 0.021 | 0.556 | 0.440 | 0.229 | 0.000 |
| long run low grey level emphasis      | 0.572 | 0.000 | 0.000 | 0.468 | 0.306 | 0.000 | 0.000 |
| long run high grey level emphasis     | 0.000 | 0.648 | 0.154 | 0.552 | 0.483 | 0.176 | 0.000 |
| run percentage                        | 0.359 | 0.284 | 0.269 | 0.629 | 0.765 | 0.280 | 0.490 |
| grey level variance                   | 0.081 | 0.312 | 0.066 | 0.607 | 0.510 | 0.358 | 0.561 |
| run length variance                   | 0.283 | 0.248 | 0.218 | 0.587 | 0.756 | 0.183 | 0.354 |
| run entropy                           | 0.253 | 0.235 | 0.156 | 0.461 | 0.688 | 0.399 | 0.654 |
| grey level non-uniformity             | 0.770 | 0.895 | 0.899 | 0.952 | 0.948 | 0.931 | 0.927 |
| grey level non-uniformity normalized  | 0.110 | 0.080 | 0.018 | 0.324 | 0.543 | 0.087 | 0.340 |
| zone size non-uniformity              | 0.955 | 0.920 | 0.931 | 0.985 | 0.954 | 0.961 | 0.958 |
| zone size non-uniformity normalized   | 0.367 | 0.275 | 0.278 | 0.639 | 0.757 | 0.298 | 0.519 |
| short runs emphasis                   | 0.350 | 0.245 | 0.241 | 0.629 | 0.757 | 0.276 | 0.436 |
| long runs emphasis                    | 0.305 | 0.231 | 0.209 | 0.599 | 0.772 | 0.199 | 0.346 |
| low grey level run emphasis           | 0.600 | 0.000 | 0.000 | 0.521 | 0.349 | 0.058 | 0.000 |

|                                            |       |       |       |       |       |       |       |
|--------------------------------------------|-------|-------|-------|-------|-------|-------|-------|
| high grey level run emphasis               | 0.000 | 0.581 | 0.036 | 0.555 | 0.449 | 0.221 | 0.000 |
| short run low grey level emphasis          | 0.610 | 0.000 | 0.000 | 0.534 | 0.360 | 0.076 | 0.052 |
| short run high grey level emphasis         | 0.000 | 0.568 | 0.021 | 0.556 | 0.440 | 0.230 | 0.000 |
| long run low grey level emphasis           | 0.571 | 0.000 | 0.000 | 0.475 | 0.304 | 0.000 | 0.000 |
| long run high grey level emphasis          | 0.000 | 0.642 | 0.141 | 0.551 | 0.484 | 0.172 | 0.000 |
| run percentage                             | 0.347 | 0.284 | 0.270 | 0.624 | 0.771 | 0.281 | 0.491 |
| grey level variance                        | 0.081 | 0.310 | 0.065 | 0.607 | 0.511 | 0.357 | 0.560 |
| run length variance                        | 0.283 | 0.266 | 0.237 | 0.588 | 0.762 | 0.204 | 0.375 |
| run entropy                                | 0.233 | 0.258 | 0.176 | 0.466 | 0.653 | 0.403 | 0.653 |
| grey level non-uniformity                  | 0.920 | 0.847 | 0.884 | 0.925 | 0.934 | 0.848 | 0.695 |
| grey level non-uniformity normalized       | 0.153 | 0.068 | 0.000 | 0.242 | 0.468 | 0.394 | 0.000 |
| zone size non-uniformity                   | 0.666 | 0.379 | 0.602 | 0.780 | 0.913 | 0.521 | 0.746 |
| zone size non-uniformity normalized        | 0.263 | 0.000 | 0.000 | 0.059 | 0.000 | 0.000 | 0.252 |
| small zone emphasis                        | 0.262 | 0.000 | 0.000 | 0.000 | 0.197 | 0.000 | 0.242 |
| large zone emphasis                        | 0.087 | 0.466 | 0.469 | 0.856 | 0.631 | 0.638 | 0.470 |
| low grey level zone emphasis               | 0.640 | 0.000 | 0.000 | 0.451 | 0.597 | 0.135 | 0.296 |
| high grey level zone emphasis              | 0.000 | 0.573 | 0.000 | 0.569 | 0.332 | 0.236 | 0.070 |
| small zone low grey level emphasis         | 0.670 | 0.000 | 0.000 | 0.567 | 0.778 | 0.294 | 0.451 |
| small zone high grey level emphasis        | 0.000 | 0.498 | 0.000 | 0.589 | 0.224 | 0.210 | 0.171 |
| large zone low grey level emphasis         | 0.000 | 0.120 | 0.122 | 0.119 | 0.053 | 0.020 | 0.000 |
| large zone high grey level emphasis        | 0.055 | 0.875 | 0.880 | 0.877 | 0.456 | 0.467 | 0.583 |
| zone percentage                            | 0.564 | 0.381 | 0.545 | 0.610 | 0.628 | 0.328 | 0.676 |
| grey level variance                        | 0.000 | 0.321 | 0.000 | 0.581 | 0.160 | 0.469 | 0.286 |
| zone size variance                         | 0.070 | 0.492 | 0.493 | 0.882 | 0.579 | 0.670 | 0.552 |
| zone size entropy                          | 0.840 | 0.251 | 0.139 | 0.726 | 0.870 | 0.499 | 0.592 |
| grey level non-uniformity                  | 0.920 | 0.847 | 0.884 | 0.925 | 0.934 | 0.848 | 0.695 |
| grey level non-uniformity normalized       | 0.146 | 0.073 | 0.000 | 0.240 | 0.463 | 0.389 | 0.000 |
| zone size non-uniformity                   | 0.830 | 0.382 | 0.468 | 0.844 | 0.983 | 0.445 | 0.768 |
| zone size non-uniformity normalized        | 0.731 | 0.707 | 0.687 | 0.701 | 0.815 | 0.693 | 0.623 |
| small distance emphasis                    | 0.678 | 0.609 | 0.589 | 0.617 | 0.835 | 0.553 | 0.607 |
| large distance emphasis                    | 0.575 | 0.581 | 0.604 | 0.514 | 0.766 | 0.579 | 0.638 |
| low grey level zone emphasis               | 0.646 | 0.000 | 0.000 | 0.449 | 0.596 | 0.132 | 0.297 |
| high grey level zone emphasis              | 0.000 | 0.573 | 0.000 | 0.569 | 0.332 | 0.236 | 0.070 |
| small distance low grey level emphasis     | 0.735 | 0.000 | 0.000 | 0.461 | 0.620 | 0.155 | 0.364 |
| small distance high grey level emphasis    | 0.000 | 0.527 | 0.006 | 0.553 | 0.223 | 0.228 | 0.144 |
| large distance low grey level emphasis     | 0.259 | 0.073 | 0.248 | 0.446 | 0.299 | 0.155 | 0.232 |
| large distance high grey level emphasis    | 0.657 | 0.632 | 0.028 | 0.577 | 0.603 | 0.252 | 0.003 |
| zone percentage                            | 0.563 | 0.382 | 0.545 | 0.611 | 0.628 | 0.328 | 0.678 |
| grey level variance                        | 0.000 | 0.321 | 0.000 | 0.581 | 0.160 | 0.469 | 0.286 |
| zone distance variance                     | 0.571 | 0.484 | 0.524 | 0.505 | 0.650 | 0.666 | 0.648 |
| zone distance entropy                      | 0.548 | 0.523 | 0.484 | 0.646 | 0.671 | 0.784 | 0.457 |
| grey level non-uniformity                  | 0.708 | 0.834 | 0.840 | 0.938 | 0.898 | 0.893 | 0.897 |
| grey level non-uniformity normalized       | 0.094 | 0.028 | 0.000 | 0.327 | 0.548 | 0.008 | 0.305 |
| dependence count non-uniformity            | 0.733 | 0.679 | 0.738 | 0.900 | 0.965 | 0.764 | 0.933 |
| dependence count non-uniformity normalized | 0.385 | 0.462 | 0.564 | 0.756 | 0.579 | 0.441 | 0.850 |
| low dependence emphasis                    | 0.495 | 0.284 | 0.447 | 0.536 | 0.438 | 0.278 | 0.605 |

|                                          |       |       |       |       |       |       |       |
|------------------------------------------|-------|-------|-------|-------|-------|-------|-------|
| high dependence emphasis                 | 0.227 | 0.195 | 0.169 | 0.614 | 0.804 | 0.186 | 0.347 |
| low grey level count emphasis            | 0.599 | 0.000 | 0.000 | 0.520 | 0.336 | 0.067 | 0.007 |
| high grey level count emphasis           | 0.000 | 0.579 | 0.030 | 0.553 | 0.456 | 0.222 | 0.000 |
| low dependence low grey level emphasis   | 0.665 | 0.322 | 0.346 | 0.726 | 0.809 | 0.393 | 0.455 |
| low dependence high grey level emphasis  | 0.205 | 0.433 | 0.005 | 0.587 | 0.259 | 0.254 | 0.212 |
| high dependence low grey level emphasis  | 0.000 | 0.000 | 0.000 | 0.262 | 0.001 | 0.000 | 0.000 |
| high dependence high grey level emphasis | 0.117 | 0.540 | 0.409 | 0.603 | 0.649 | 0.092 | 0.058 |
| grey level variance                      | 0.088 | 0.303 | 0.069 | 0.610 | 0.538 | 0.340 | 0.581 |
| dependence count variance                | 0.204 | 0.246 | 0.226 | 0.683 | 0.852 | 0.222 | 0.428 |
| dependence count entropy                 | 0.917 | 0.748 | 0.783 | 0.898 | 0.878 | 0.847 | 0.820 |
| dependence count energy                  | 0.919 | 0.560 | 0.573 | 0.812 | 0.783 | 0.746 | 0.513 |
| mean                                     | 0.282 | 0.713 | 0.482 | 0.661 | 0.617 | 0.650 | 0.620 |
| standard deviation                       | 0.002 | 0.462 | 0.739 | 0.792 | 0.705 | 0.674 | 0.412 |
| coefficient of variation                 | 0.427 | 0.425 | 0.572 | 0.712 | 0.706 | 0.744 | 0.000 |
| skewness                                 | 0.615 | 0.615 | 0.615 | 0.507 | 0.473 | 0.615 | 0.615 |
| kurtosis                                 | 0.572 | 0.572 | 0.568 | 0.636 | 0.000 | 0.572 | 0.572 |
| variance                                 | 0.000 | 0.417 | 0.694 | 0.835 | 0.738 | 0.606 | 0.457 |
| median                                   | 0.277 | 0.590 | 0.348 | 0.622 | 0.594 | 0.559 | 0.420 |
| percentile 10th                          | 0.452 | 0.801 | 0.688 | 0.445 | 0.635 | 0.580 | 0.410 |
| percentile 90th                          | 0.184 | 0.296 | 0.181 | 0.774 | 0.445 | 0.752 | 0.599 |
| interquartile range                      | 0.000 | 0.178 | 0.558 | 0.503 | 0.473 | 0.336 | 0.486 |
| range                                    | 0.040 | 0.339 | 0.632 | 0.577 | 0.386 | 0.616 | 0.364 |
| mean absolut deviation                   | 0.000 | 0.374 | 0.698 | 0.771 | 0.729 | 0.564 | 0.545 |
| robust mean absolut deviation            | 0.000 | 0.213 | 0.549 | 0.545 | 0.608 | 0.353 | 0.482 |
| energy                                   | 0.051 | 0.816 | 0.697 | 0.802 | 0.941 | 0.600 | 0.861 |
| entropy                                  | 0.458 | 0.200 | 0.403 | 0.601 | 0.928 | 0.428 | 0.287 |
| root mean square                         | 0.260 | 0.570 | 0.256 | 0.691 | 0.598 | 0.540 | 0.357 |
| uniformity                               | 0.428 | 0.224 | 0.385 | 0.535 | 0.858 | 0.387 | 0.215 |
| energy                                   | 0.667 | 0.629 | 0.635 | 0.654 | 0.732 | 0.612 | 0.629 |
| entropy                                  | 0.908 | 0.874 | 0.887 | 0.924 | 0.897 | 0.884 | 0.846 |
| contrast                                 | 0.755 | 0.535 | 0.732 | 0.859 | 0.590 | 0.809 | 0.693 |
| correlation                              | 0.871 | 0.873 | 0.873 | 0.868 | 0.749 | 0.867 | 0.873 |
| homogeneity                              | 0.846 | 0.734 | 0.881 | 0.838 | 0.167 | 0.770 | 0.647 |
| homogeneity normalized                   | 0.763 | 0.744 | 0.742 | 0.772 | 0.495 | 0.767 | 0.764 |
| inverese difference                      | 0.842 | 0.705 | 0.880 | 0.856 | 0.324 | 0.774 | 0.691 |
| inverese difference normalized           | 0.783 | 0.764 | 0.763 | 0.787 | 0.461 | 0.776 | 0.779 |
| variance                                 | 0.588 | 0.436 | 0.664 | 0.859 | 0.770 | 0.720 | 0.620 |
| sum of average                           | 0.667 | 0.591 | 0.715 | 0.597 | 0.320 | 0.408 | 0.362 |
| sum of entropy                           | 0.772 | 0.673 | 0.727 | 0.866 | 0.881 | 0.761 | 0.750 |
| sum of variance                          | 0.349 | 0.363 | 0.593 | 0.783 | 0.822 | 0.649 | 0.703 |
| difference entropy                       | 0.597 | 0.502 | 0.643 | 0.769 | 0.866 | 0.654 | 0.521 |
| difference variance                      | 0.644 | 0.427 | 0.615 | 0.834 | 0.789 | 0.717 | 0.512 |
| information measures of correlation 1    | 0.938 | 0.848 | 0.916 | 0.890 | 0.906 | 0.916 | 0.898 |
| information measures of correlation 2    | 0.650 | 0.719 | 0.702 | 0.406 | 0.107 | 0.482 | 0.689 |

|                                       |       |       |       |       |       |       |       |
|---------------------------------------|-------|-------|-------|-------|-------|-------|-------|
| maximal correlation coefficient       | 0.885 | 0.796 | 0.795 | 0.375 | 0.950 | 0.820 | 0.770 |
| joint maximum                         | 0.680 | 0.467 | 0.477 | 0.470 | 0.737 | 0.506 | 0.467 |
| joint average                         | 0.667 | 0.591 | 0.717 | 0.597 | 0.320 | 0.408 | 0.362 |
| difference average                    | 0.779 | 0.621 | 0.832 | 0.888 | 0.508 | 0.823 | 0.748 |
| dissimilarity                         | 0.779 | 0.621 | 0.832 | 0.888 | 0.508 | 0.823 | 0.748 |
| inverse variance                      | 0.669 | 0.767 | 0.877 | 0.867 | 0.000 | 0.825 | 0.495 |
| autocorrelation                       | 0.580 | 0.656 | 0.739 | 0.444 | 0.341 | 0.188 | 0.251 |
| cluster tendency                      | 0.349 | 0.363 | 0.593 | 0.783 | 0.822 | 0.649 | 0.703 |
| cluster shade                         | 0.543 | 0.801 | 0.804 | 0.803 | 0.815 | 0.870 | 0.738 |
| cluster prominence                    | 0.385 | 0.459 | 0.598 | 0.875 | 0.850 | 0.830 | 0.707 |
| energy                                | 0.474 | 0.448 | 0.526 | 0.476 | 0.825 | 0.492 | 0.231 |
| entropy                               | 0.553 | 0.357 | 0.507 | 0.734 | 0.885 | 0.552 | 0.315 |
| contrast                              | 0.764 | 0.532 | 0.739 | 0.876 | 0.698 | 0.793 | 0.702 |
| correlation                           | 0.871 | 0.872 | 0.872 | 0.879 | 0.804 | 0.866 | 0.874 |
| homogeneity                           | 0.835 | 0.728 | 0.874 | 0.847 | 0.356 | 0.770 | 0.628 |
| homogeneity normalized                | 0.768 | 0.744 | 0.742 | 0.774 | 0.541 | 0.765 | 0.767 |
| inverse difference                    | 0.831 | 0.703 | 0.876 | 0.859 | 0.535 | 0.776 | 0.679 |
| inverse difference normalized         | 0.783 | 0.762 | 0.762 | 0.786 | 0.510 | 0.769 | 0.781 |
| variance                              | 0.597 | 0.439 | 0.664 | 0.862 | 0.782 | 0.715 | 0.618 |
| sum of average                        | 0.666 | 0.591 | 0.717 | 0.594 | 0.308 | 0.406 | 0.361 |
| sum of entropy                        | 0.304 | 0.455 | 0.642 | 0.722 | 0.845 | 0.673 | 0.591 |
| sum of variance                       | 0.389 | 0.368 | 0.594 | 0.794 | 0.800 | 0.658 | 0.694 |
| difference entropy                    | 0.745 | 0.617 | 0.806 | 0.800 | 0.849 | 0.784 | 0.641 |
| difference variance                   | 0.673 | 0.473 | 0.641 | 0.835 | 0.706 | 0.773 | 0.504 |
| information measures of correlation 1 | 0.749 | 0.608 | 0.671 | 0.675 | 0.318 | 0.800 | 0.597 |
| information measures of correlation 2 | 0.670 | 0.458 | 0.564 | 0.448 | 0.577 | 0.637 | 0.633 |
| maximal correlation coefficient       | 0.573 | 0.581 | 0.608 | 0.576 | 0.347 | 0.742 | 0.737 |
| joint maximum                         | 0.746 | 0.568 | 0.582 | 0.315 | 0.679 | 0.628 | 0.282 |
| joint average                         | 0.666 | 0.591 | 0.717 | 0.594 | 0.308 | 0.406 | 0.361 |
| difference average                    | 0.781 | 0.615 | 0.836 | 0.893 | 0.639 | 0.812 | 0.756 |
| dissimilarity                         | 0.781 | 0.615 | 0.836 | 0.893 | 0.639 | 0.812 | 0.756 |
| inverse variance                      | 0.660 | 0.762 | 0.874 | 0.863 | 0.201 | 0.808 | 0.462 |
| autocorrelation                       | 0.581 | 0.655 | 0.739 | 0.450 | 0.330 | 0.191 | 0.249 |
| cluster tendency                      | 0.389 | 0.368 | 0.594 | 0.794 | 0.800 | 0.658 | 0.694 |
| cluster shade                         | 0.550 | 0.788 | 0.791 | 0.801 | 0.817 | 0.862 | 0.739 |
| cluster prominence                    | 0.399 | 0.437 | 0.572 | 0.872 | 0.842 | 0.801 | 0.700 |
| coarseness                            | 0.756 | 0.828 | 0.840 | 0.881 | 0.543 | 0.823 | 0.855 |
| contrast                              | 0.850 | 0.807 | 0.830 | 0.509 | 0.184 | 0.949 | 0.946 |
| busyness                              | 0.409 | 0.263 | 0.433 | 0.516 | 0.473 | 0.381 | 0.447 |
| complexity                            | 0.602 | 0.189 | 0.606 | 0.561 | 0.867 | 0.540 | 0.372 |
| strength                              | 0.911 | 0.749 | 0.795 | 0.793 | 0.446 | 0.857 | 0.456 |
| grey level non-uniformity             | 0.893 | 0.918 | 0.943 | 0.922 | 0.894 | 0.881 | 0.933 |
| grey level non-uniformity normalized  | 0.418 | 0.222 | 0.399 | 0.556 | 0.865 | 0.379 | 0.256 |
| zone size non-uniformity              | 0.971 | 0.955 | 0.957 | 0.964 | 0.940 | 0.960 | 0.960 |
| zone size non-uniformity normalized   | 0.891 | 0.712 | 0.869 | 0.853 | 0.000 | 0.741 | 0.784 |
| short runs emphasis                   | 0.892 | 0.711 | 0.862 | 0.854 | 0.000 | 0.739 | 0.776 |

|                                      |       |       |       |       |       |       |       |
|--------------------------------------|-------|-------|-------|-------|-------|-------|-------|
| long runs emphasis                   | 0.887 | 0.732 | 0.862 | 0.833 | 0.000 | 0.775 | 0.832 |
| low grey level run emphasis          | 0.864 | 0.317 | 0.600 | 0.493 | 0.682 | 0.615 | 0.676 |
| high grey level run emphasis         | 0.492 | 0.583 | 0.725 | 0.554 | 0.423 | 0.231 | 0.163 |
| short run low grey level emphasis    | 0.863 | 0.339 | 0.626 | 0.492 | 0.693 | 0.635 | 0.715 |
| short run high grey level emphasis   | 0.495 | 0.577 | 0.723 | 0.560 | 0.419 | 0.237 | 0.135 |
| long run low grey level emphasis     | 0.858 | 0.250 | 0.569 | 0.500 | 0.637 | 0.528 | 0.550 |
| long run high grey level emphasis    | 0.490 | 0.605 | 0.729 | 0.538 | 0.437 | 0.202 | 0.263 |
| run percentage                       | 0.895 | 0.728 | 0.870 | 0.844 | 0.000 | 0.763 | 0.803 |
| grey level variance                  | 0.614 | 0.413 | 0.698 | 0.828 | 0.741 | 0.602 | 0.472 |
| run length variance                  | 0.872 | 0.756 | 0.874 | 0.808 | 0.000 | 0.774 | 0.858 |
| run entropy                          | 0.584 | 0.194 | 0.392 | 0.612 | 0.939 | 0.468 | 0.650 |
| grey level non-uniformity            | 0.893 | 0.919 | 0.943 | 0.922 | 0.895 | 0.881 | 0.933 |
| grey level non-uniformity normalized | 0.422 | 0.212 | 0.393 | 0.544 | 0.867 | 0.392 | 0.248 |
| zone size non-uniformity             | 0.971 | 0.955 | 0.958 | 0.964 | 0.940 | 0.960 | 0.959 |
| zone size non-uniformity normalized  | 0.889 | 0.711 | 0.870 | 0.856 | 0.000 | 0.740 | 0.781 |
| short runs emphasis                  | 0.890 | 0.716 | 0.867 | 0.847 | 0.000 | 0.744 | 0.785 |
| long runs emphasis                   | 0.890 | 0.738 | 0.867 | 0.825 | 0.000 | 0.774 | 0.829 |
| low grey level run emphasis          | 0.862 | 0.323 | 0.611 | 0.483 | 0.684 | 0.613 | 0.677 |
| high grey level run emphasis         | 0.492 | 0.583 | 0.725 | 0.554 | 0.423 | 0.231 | 0.163 |
| short run low grey level emphasis    | 0.864 | 0.343 | 0.622 | 0.483 | 0.695 | 0.636 | 0.713 |
| short run high grey level emphasis   | 0.501 | 0.577 | 0.723 | 0.560 | 0.419 | 0.237 | 0.135 |
| long run low grey level emphasis     | 0.858 | 0.249 | 0.570 | 0.496 | 0.638 | 0.527 | 0.552 |
| long run high grey level emphasis    | 0.491 | 0.604 | 0.729 | 0.538 | 0.437 | 0.202 | 0.264 |
| run percentage                       | 0.896 | 0.726 | 0.871 | 0.845 | 0.000 | 0.767 | 0.808 |
| grey level variance                  | 0.613 | 0.413 | 0.698 | 0.828 | 0.742 | 0.602 | 0.472 |
| run length variance                  | 0.871 | 0.754 | 0.871 | 0.813 | 0.000 | 0.779 | 0.853 |
| run entropy                          | 0.573 | 0.229 | 0.408 | 0.624 | 0.942 | 0.467 | 0.626 |
| grey level non-uniformity            | 0.964 | 0.918 | 0.885 | 0.903 | 0.952 | 0.956 | 0.915 |
| grey level non-uniformity normalized | 0.443 | 0.260 | 0.529 | 0.458 | 0.941 | 0.533 | 0.013 |
| zone size non-uniformity             | 0.686 | 0.194 | 0.609 | 0.800 | 0.922 | 0.543 | 0.601 |
| zone size non-uniformity normalized  | 0.717 | 0.126 | 0.477 | 0.835 | 0.000 | 0.639 | 0.555 |
| small zone emphasis                  | 0.653 | 0.022 | 0.350 | 0.819 | 0.000 | 0.593 | 0.563 |
| large zone emphasis                  | 0.843 | 0.709 | 0.754 | 0.801 | 0.000 | 0.647 | 0.512 |
| low grey level zone emphasis         | 0.823 | 0.255 | 0.463 | 0.455 | 0.859 | 0.648 | 0.798 |
| high grey level zone emphasis        | 0.352 | 0.518 | 0.679 | 0.537 | 0.361 | 0.235 | 0.031 |
| small zone low grey level emphasis   | 0.802 | 0.394 | 0.419 | 0.540 | 0.791 | 0.835 | 0.658 |
| small zone high grey level emphasis  | 0.428 | 0.387 | 0.611 | 0.598 | 0.331 | 0.286 | 0.000 |
| large zone low grey level emphasis   | 0.804 | 0.000 | 0.245 | 0.716 | 0.263 | 0.338 | 0.476 |
| large zone high grey level emphasis  | 0.691 | 0.747 | 0.754 | 0.275 | 0.451 | 0.611 | 0.487 |
| zone percentage                      | 0.848 | 0.569 | 0.787 | 0.898 | 0.000 | 0.754 | 0.776 |
| grey level variance                  | 0.698 | 0.473 | 0.731 | 0.801 | 0.579 | 0.649 | 0.153 |
| zone size variance                   | 0.857 | 0.758 | 0.764 | 0.748 | 0.087 | 0.635 | 0.437 |
| zone size entropy                    | 0.855 | 0.816 | 0.822 | 0.796 | 0.936 | 0.803 | 0.810 |
| grey level non-uniformity            | 0.964 | 0.918 | 0.885 | 0.903 | 0.952 | 0.956 | 0.915 |
| grey level non-uniformity normalized | 0.464 | 0.261 | 0.523 | 0.464 | 0.945 | 0.528 | 0.006 |
| zone size non-uniformity             | 0.885 | 0.680 | 0.772 | 0.934 | 0.937 | 0.800 | 0.848 |

|                                            |       |       |       |       |       |       |       |
|--------------------------------------------|-------|-------|-------|-------|-------|-------|-------|
| zone size non-uniformity normalized        | 0.736 | 0.746 | 0.749 | 0.836 | 0.799 | 0.736 | 0.513 |
| small distance emphasis                    | 0.756 | 0.744 | 0.746 | 0.883 | 0.791 | 0.789 | 0.503 |
| large distance emphasis                    | 0.819 | 0.754 | 0.775 | 0.886 | 0.778 | 0.812 | 0.560 |
| low grey level zone emphasis               | 0.822 | 0.250 | 0.451 | 0.462 | 0.861 | 0.655 | 0.799 |
| high grey level zone emphasis              | 0.352 | 0.518 | 0.679 | 0.537 | 0.361 | 0.235 | 0.031 |
| small distance low grey level emphasis     | 0.837 | 0.240 | 0.328 | 0.419 | 0.859 | 0.909 | 0.866 |
| small distance high grey level emphasis    | 0.470 | 0.526 | 0.693 | 0.621 | 0.364 | 0.288 | 0.166 |
| large distance low grey level emphasis     | 0.818 | 0.078 | 0.141 | 0.087 | 0.811 | 0.358 | 0.685 |
| large distance high grey level emphasis    | 0.349 | 0.509 | 0.678 | 0.330 | 0.364 | 0.188 | 0.033 |
| zone percentage                            | 0.849 | 0.569 | 0.787 | 0.899 | 0.000 | 0.754 | 0.776 |
| grey level variance                        | 0.698 | 0.473 | 0.731 | 0.801 | 0.579 | 0.649 | 0.153 |
| zone distance variance                     | 0.830 | 0.747 | 0.749 | 0.846 | 0.726 | 0.777 | 0.555 |
| zone distance entropy                      | 0.814 | 0.514 | 0.654 | 0.695 | 0.944 | 0.698 | 0.368 |
| grey level non-uniformity                  | 0.889 | 0.918 | 0.942 | 0.921 | 0.886 | 0.879 | 0.928 |
| grey level non-uniformity normalized       | 0.442 | 0.224 | 0.388 | 0.537 | 0.858 | 0.393 | 0.220 |
| dependence count non-uniformity            | 0.897 | 0.697 | 0.836 | 0.900 | 0.911 | 0.729 | 0.861 |
| dependence count non-uniformity normalized | 0.883 | 0.664 | 0.832 | 0.910 | 0.000 | 0.793 | 0.815 |
| low dependence emphasis                    | 0.829 | 0.438 | 0.714 | 0.893 | 0.000 | 0.747 | 0.775 |
| high dependence emphasis                   | 0.865 | 0.798 | 0.871 | 0.745 | 0.135 | 0.808 | 0.863 |
| low grey level count emphasis              | 0.861 | 0.337 | 0.625 | 0.484 | 0.668 | 0.602 | 0.657 |
| high grey level count emphasis             | 0.502 | 0.587 | 0.727 | 0.557 | 0.429 | 0.236 | 0.182 |
| low dependence low grey level emphasis     | 0.903 | 0.702 | 0.731 | 0.620 | 0.735 | 0.927 | 0.893 |
| low dependence high grey level emphasis    | 0.675 | 0.392 | 0.617 | 0.658 | 0.355 | 0.346 | 0.000 |
| high dependence low grey level emphasis    | 0.899 | 0.104 | 0.424 | 0.559 | 0.029 | 0.457 | 0.574 |
| high dependence high grey level emphasis   | 0.678 | 0.761 | 0.781 | 0.346 | 0.611 | 0.451 | 0.627 |
| grey level variance                        | 0.602 | 0.411 | 0.697 | 0.832 | 0.747 | 0.601 | 0.496 |
| dependence count variance                  | 0.796 | 0.865 | 0.877 | 0.702 | 0.493 | 0.868 | 0.900 |
| dependence count entropy                   | 0.942 | 0.896 | 0.898 | 0.868 | 0.956 | 0.916 | 0.938 |
| dependence count energy                    | 0.910 | 0.704 | 0.707 | 0.705 | 0.958 | 0.864 | 0.933 |

**Table S5:** Number of robust features based on Lin's concordance coefficients using different normalization approaches.

| Normalization | Stable features, CCC >0.9 |           |         |          |                |
|---------------|---------------------------|-----------|---------|----------|----------------|
|               | Shape                     | Intensity | Texture | Wavelets | All            |
| FBN           | 14/18                     | 0/17      | 3/137   | 52/1232  | 69/1404 (4.9%) |
| FBS1          | 14/18                     | 0/17      | 8/137   | 17/1232  | 39/1404 (2.7%) |
| FBS2          | 14/18                     | 0/17      | 6/137   | 24/1232  | 44/1404 (3.1%) |
| HM_VOI        | 14/18                     | 9/17      | 37/137  | 61/1232  | 98/1404 (6.9%) |
| HM_brain      | 14/18                     | 0/17      | 11/137  | 56/1232  | 81/1404 (5.7%) |
| ZS_VOI        | 14/18                     | 3/17      | 14/137  | 51/1232  | 82/1404 (5.8%) |
| ZS_brain      | 14/18                     | 1/17      | 10/137  | 44/1232  | 68/1404 (4.8%) |





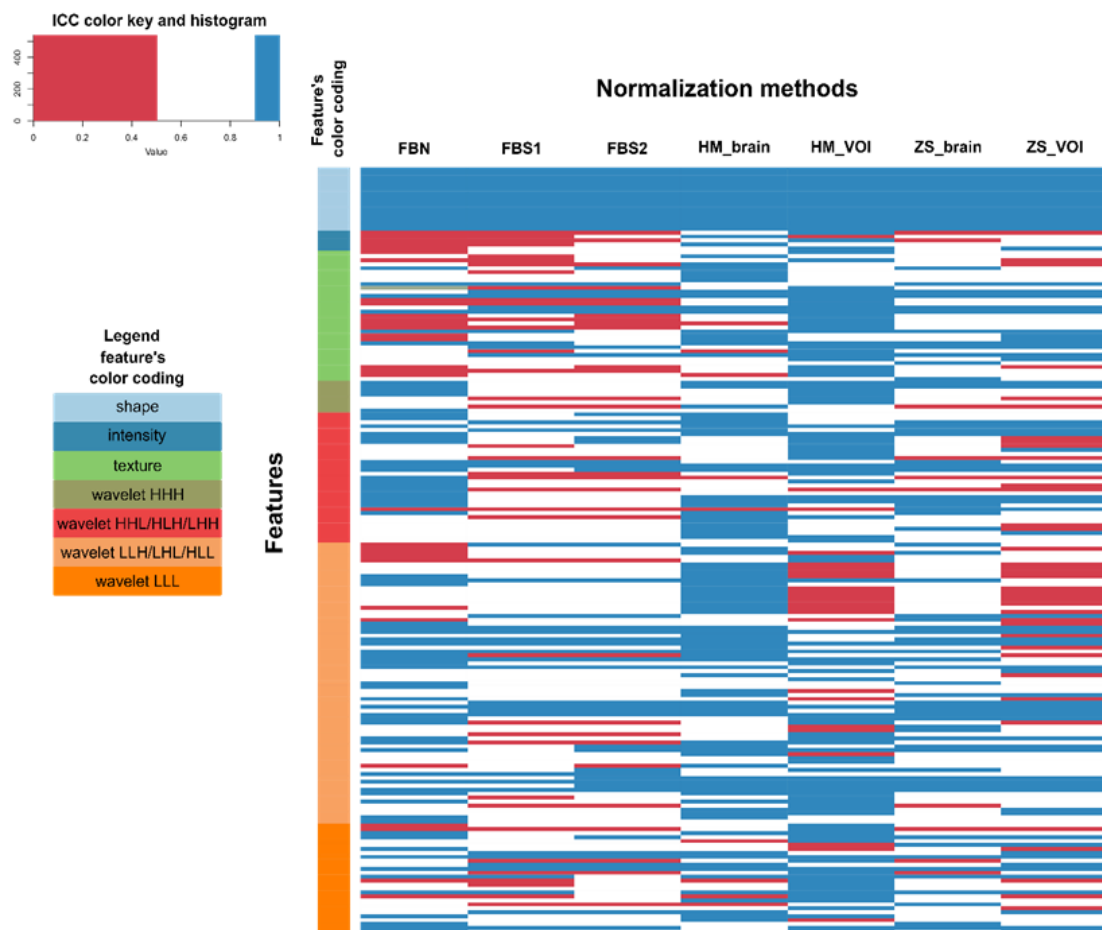

**Figure S1:** ICC heat map for various intensity normalization types, where red indicates poor agreement, blue stable features and white moderate agreement. The type of features was also color coded to depict impact of different normalization methods on respective feature types.

|     |      |      |          |        |          |        |          |
|-----|------|------|----------|--------|----------|--------|----------|
| 86  | 99   | 103  | 138      | 142    | 111      | 113    | FBN      |
|     | 54   | 65   | 118      | 130    | 85       | 81     | FBS1     |
|     |      | 61   | 122      | 133    | 88       | 86     | FBS2     |
|     |      |      | 111      | 169    | 131      | 125    | HM_brain |
|     |      |      |          | 115    | 143      | 134    | HM_VOI   |
|     |      |      |          |        | 81       | 94     | ZS_brain |
|     |      |      |          |        |          | 75     | ZS_VOI   |
| FBN | FBS1 | FBS2 | HM_brain | HM_VOI | ZS_brain | ZS_VOI |          |

**Figure S2:** Amount of stable features which can be achieved by pairwise combination of different normalization methods.
